# Supplementary material for: Recent Advances in the Composition and Heterogeneity of the Arabidopsis Mitochondrial Proteome
Source: Front Plant Sci. 2013 Jan 25;4:4. doi: 10.3389/fpls.2013.00004 (PMC3554846; doi:10.3389/fpls.2013.00004)
Supplement: Supplementary Table S1 — Mitochondrial proteins identified by mass spectrometry or fluorescent protein localization studies. (A) All proteins identified from isolated mitochondria from Arabidopsis using proteomics in the last 5 years. (B) A set of proteins which has a high probably being located in the mitochondrion. For the inclusion of a protein in the list, it should meet the following criteria: (i) A protein is automatically considered mitochondrial if at least two studies have identified it in isolated mitochondrial fraction. However, a protein is considered to be non-mitochondrial if it is identified in equal number of or more non-mitochondrial proteomics studies than the mitochondrial ones. (ii) If the location of a protein is verified independently by fluorescent protein localization analysis, then (ii) is ignored and it is included in the list. (iii) If a protein is identified by one study, the localization based on SUBAcon score and/or ARAMEMNON localization consensus score is also considered. (C) Mitochondrial protein confirmed through fluorescent protein localization studies (according to SUBA) only and not by proteomics. [file 40797_Lee_DataSheet1.XLSX]

## Sheet: Annotation
Supplemental Table 1.
A. All proteins identified from isolated mitochondria from Arabidopsis using proteomics in the last five years.
B. A set of proteins which has a high probably being located in the mitochondrion. For the inclusion of a protein in the list, it should meet the following criteria:
(i) A protein is automatically considered mitochondrial if at least two studies have identified it in isolated mitochondrial fraction. However, a protein is considered to be non-mitochondrial if it is identified in equal number of or more non-mitochondrial proteomics studies than the mitochondrial ones. (ii) If the location of a protein is verified independently by fluorescent protein localizatio…
C. Mitochondrial protein confirmed through fluorescent protein localization studies (according to SUBA) only and not by proteomics
References (Proteomics data only - Table S1A and S1B)
Duncan, O., Taylor, N.L., Carrie, C., Eubel, H., Kubiszewski-Jakubiak, S., Zhang, B., Narsai, R., Millar, A.H., and Whelan, J. (2011). Multiple lines of evidence localize signaling, morphology, and lipid biosynthesis machinery to the mitochondrial outer membrane of Arabidopsis. Plant Physiol. 157, 1093-1113.
Ito, J., Heazlewood, J.L., and Millar, A.H. (2007). The plant mitochondrial proteome and the challenge of defining the posttranslational modifications responsible for signalling and stress effects on respiratory functions. Physiol. Plant. 129, 207-224.
Ito, J., Taylor, N.L., Castleden, I., Weckwerth, W., Millar, A.H., and Heazlewood, J.L. (2009). A survey of the Arabidopsis thaliana mitochondrial phosphoproteome. Proteomics 9, 4229-4240.
Klodmann, J., Senkler, M., Rode, C., and Braun, H.-P. (2011b). Defining the protein complex proteome of plant mitochondria. Plant Physiol. 157, 587-598.
Klodmann, J., Sunderhaus, S., Nimtz, M., Jänsch, L., and Braun, H.-P. (2010). Internal architecture of mitochondrial complex I from Arabidopsis thaliana. Plant Cell 22, 797-810.
Lee, C.P., Eubel, H., and Millar, A.H. (2010). Diurnal changes in mitochondrial function reveal daily optimization of light and dark respiratory metabolism in Arabidopsis. Mol. Cell. Proteomics 9, 2125-2139.
Lee, C.P., Eubel, H., O'Toole, N., and Millar, A.H. (2008). Heterogeneity of the mitochondrial proteome for photosynthetic and non-photosynthetic Arabidopsis metabolism. Mol. Cell. Proteomics 7, 1297-1316.
Lee, C.P., Eubel, H., O'Toole, N., and Millar, A.H. (2011). Combining proteomics of root and shoot mitochondria and transcript analysis to define constitutive and variable components in plant mitochondria. Phytochemistry 72, 1092-1108.
Lee, C.P., Eubel, H., Solheim, C., and Millar, A.H. (2012). Mitochondrial proteome heterogeneity between tissues from the vegetative and reproductive stages of Arabidopsis thaliana development. J. Proteome Res. 11, 3326-3343.
Livaja, M., Palmieri, M.C., von Rad, U., and Durner, J. (2008). The effect of the bacterial effector protein harpin on transcriptional profile and mitochondrial proteins of Arabidopsis thaliana. J. Proteomics 71, 148-159.
Solheim, C., Li, L., Hatzopoulos, P., and Millar, A.H. (2012). Loss of Lon1 in Arabidopsis changes the mitochondrial proteome leading to altered metabolite profiles and growth retardation without an accumulation of oxidative damage. Plant Physiol., doi:10.1104/pp.1112.203711
Tan, Y.-F., Millar, A.H., and Taylor, N.L. (2012). Components of mitochondrial oxidative phosphorylation vary in abundance following exposure to cold and chemical stresses. J. Proteome Res. 11, 3860-3879
Tan, Y.-F., O'Toole, N., Taylor, N.L., and Millar, A.H. (2010). Divalent metal ions in plant mitochondria and their role in interactions with proteins and oxidative stress-induced damage to respiratory function. Plant Physiol. 152, 747-761.
Taylor, N.L., Heazlewood, J.L., and Millar, A.H. (2011). The Arabidopsis thaliana 2-D gel mitochondrial proteome: Refining the value of reference maps for assessing protein abundance, contaminants and post-translational modifications. Proteomics 11, 1720-1733.
Tomaz, T., Bagard, M., Pracharoenwattana, I., Lindén, P., Lee, C.P., Carroll, A.J., Ströher, E., Smith, S.M., Gardeström, P., and Millar, A.H. (2010). Mitochondrial malate dehydrogenase lowers leaf respiration and alters photorespiration and plant growth in Arabidopsis. Plant Physiol. 154, 1143-1157.

## Sheet: Table S1A
Accession	Name
AT1G02370	PPR9-2
AT1G02410	COX assembly protein CtaG / Cox11 family
At1g02930	GST F6 glutathione S-transferase
AT1G03090	MCCase Methylcrotonoyl-CoA carboxylase a-subunit
At1g03475	coproporphyrinogen III oxidase
AT1G03860	prohibitin-2
AT1G04070	TOM22-I
AT1G04270	RPS15 (cytosolic ribosomal protein S15)
AT1G04280	At1g04280
AT1G04340	lesion inducing protein-related
At1g04410	MDH-1 malate dehydrogenase
AT1G04630	NADH dehydrogenase B16.6 subunit
At1g04820	TUA4 tubulin alpha-2/alpha-4 chain (TUA4),
At1g05270	TraB family protein
AT1G06050	At1g06050
At1g06130	hydroxyacylglutathione hydrolase
At1g06530	Myosin related
At1g07040	expressed protein
AT1G07070	60S ribosomal protein L35a
AT1G07210	30S ribosomal protein S18 family
At1g07750	cupin family protein
AT1G07830	ribosomal protein L29 family protein
AT1G07920	elongation factor 1-alpha
At1g08110	lactoylglutathione lyase
AT1G08220	At1g08220
AT1G08470	Strictosidine synthase family protein
AT1G08480	SDH6
AT1G08640	At1g08640
At1g09300	Metallopeptidase M24 family protein
At1g09780	2,3-biphosphoglycerate-independent phosphoglycerate mutase
AT1G11860	GDT1 aminomethyltransferase
AT1G13280	AOC4 (allene oxide cyclase 4)
At1g13440	GAP glyceraldehyde 3-phosphate dehydrogenase
AT1G14140	mt substrate carrier family protein
AT1G14320	ribosomal protein L10
AT1G14450	B12-1
AT1G14620	DECOY (ribosomal protein L46)
At1g14810	semialdehyde dehydrogenase family protein
AT1G14980	HSP10-1
AT1G15060	alpha/beta hydrolase
AT1G15120	QCR6-1, Hinge protein
AT1G15390	PDF1A Peptide deformylase 1A
AT1G15480	PPR2-1
At1g15730	PRLI-interacting factor L
AT1G16700	TYKY-2
AT1G16740	ribosomal protein L20 family protein
AT1G16870	mt 28S ribosomal protein S29-related
AT1G17290	AlaAT1 (alanine aminotransferase 1)
AT1G17350	auxin-induced-related
AT1G18320	At3g10110/At1g18320-2 (plant specific complex I subunit)
At1g18490	expressed protein expressed protein
At1g19140	expressed protein expressed protein
AT1G19240	At1g19240
AT1G19580	CA1 (gamma carbonic anhydrase 1)
At1g20010	TUB5 tubulin beta-5 chain (TUB5)
AT1G20080	SYTB (synaptoagmin 2), function unknown
AT1G20510	OPCL1 (OPC-8:0 CoA ligase 1)
AT1G20620	CAT3 (catalase 3)
AT1G20630	CAT1 (catalase 1)
AT1G20890	At1g20890
At1g22300	GRF10 14-3-3 protein GF14 epsilon (GRF10),
AT1G22450	COX 6b-1 Cytochrome c oxidase subunit 6b
At1g22800	expressed protein, similar to Biotin synthesis protein bioC
AT1G22840	cytochrome c
AT1G23100	HSP10-2
AT1G24180	E1 alpha-2 (pyruvate dehydrogenase)
AT1G24240	ribosomal protein L19 family protein
At1g24267	Unknown protein
AT1G25375	Metallo-hydrolase/oxidoreductase superfamily
AT1G26340	CB5-A (cytochrome b5 isoform A)
AT1G26460	PPR1
AT1G26750	At1g26750
AT1G27390	TOM20-2
At1g31180	IMDH-1 3-isopropylmalate dehydrogenase
AT1G32470	GDH Glycine decarboxylase H subunit
At1g32580	DAG3 plastid developmental protein DAG
AT1G33120	60S ribosomal protein L9 (RPL90B)
At1g35720	annexin 1 (ANN1),
AT1G45332	Mitochondrial elongation factor
At1g47260	FPBP2 bacterial transferase hexapeptide repeat-containing protein
At1g47420	SDH5 expressed protein
At1g48030	DHLP E3-1 dihydrolipoamide dehydrogenase 1
AT1G48200	At1g48200
AT1G48520	GATB (Glu-tRNA(Gln) amidotransferase subunit B)
AT1G48830	40S ribosomal protein S7 (RPS7A)
At1g48860	3-phosphoshikimate 1-carboxyvinyltransferase
AT1G49140	PDSW-2
At1g49410	TOM6
AT1G50460	HKL1 (hexokinase-like 1)
At1g50940	ETF alpha electron transfer flavoprotein alpha subunit family protein
At1g51390	NFU5 Fe−S centre protein
AT1G51610	MTPc4 (metal tolerance protein)
AT1G51650	epsilon subunit
At1g51980	MPP alpha-1 mitochondrial processing peptidase alpha subunit
AT1G52191	thioesterase superfamily protein
AT1G52370	ribosomal protein L22 family protein
AT1G52760	lysophospholipase 2
AT1G53000	Cytidylyltransferase family
AT1G53240	malate dehydrogenase 1
AT1G53760	At1g53760
AT1G54220	E3-2 (dihydrolipoamide dehydrogenase)
AT1G55160	At1g55160
AT1G55510	BCDH BETA1 (branched-chain alpha-keto acid decarboxylase E1 beta)
AT1G55890	PPR8-1
AT1G56340	CRT1 (calretulin 1)
At1g56410	HSP70T-1 heat shock cognate 70 kDa protein,
AT1G58380	XW6 (structural constituent of ribosome)
AT1G59900	E1 alpha-1 (pyruvate dehydrogenase)
AT1G60770	PPR9-1
AT1G61570	TIM13 Translocase of the inner membrane 13kDa
AT1G61870	PPR6
At1g62380	1-aminocyclopropane-1-carboxylate oxidase
At1g62750	Translation elongation factor EFG/EF2 protein
AT1G62850	Translation release factor
AT1G63770	peptidase M1 family protein
AT1G63940	MDAR6 (monodehydroascorbate reductase 6)
AT1G64100	PPR10
AT1G64190	6-dihydrofolate synthetase family protein
AT1G64880	ribosomal protein S5 family protein
AT1G65032	At1g65032
At1g65290	NDUFAB1-1 acyl carrier family protein
At1g65930	IDHP-2 isocitrate dehydrogenase
At1g65980	peroxiredoxin type 2
At1g66410	calmodulin-1/4 (CAM4), identical to calmodulin
At1g66540	cytochrome P450
AT1G67350	At1g67350 (plant specific complex I subunit)
AT1G67785	At1g67785 (plant specific complex I subunit)
AT1G68680	At1g68680 (plant specific complex I subunit)
At1g68910	expressed protein, similar to Myosin heavy chain
At1g69740	ALAD-2 porphobilinogen synthase
At1g70190	RPL12D ribosomal protein L12 family protein
At1g71310	expressed protein hypothetical protein
AT1G72170	At1g72170 (plant specific complex I subunit)
At1g72330	alanine aminotransferase
AT1G72750	TIM23-2
AT1G72820	mt substrate carrier family protein
At1g73050	(R)-mandelonitrile lyase
AT1G73990	SPPA (serine-type endopeptidase)
At1g74030	enolase
AT1G74230	GR-RBP5 (glycine-rich RNA-binding protein 5)
At1g75270	DHAR2 dehydroascorbate reductase
At1g76030	vacuolar ATP synthase subunit B
AT1G76200	AGGG
At1g77120	ATADH
At1g78380	GST U19 glutathione S-transferase
At1g78900	VHA-A Encodes catalytic subunit A of the vacuolar ATP synthase
At1g79010	NDUSF8-1 NADH-ubiquinone oxidoreductase 23 kDa subunit
At1g79230	mercaptopyruvate sulfurtransferase (MST1)
At1g79440	succinate-semialdehyde dehydrogenase (SSADH1)
AT1G79750	NADP-malic enzyme 4
AT1G80230	COX 5b-1 Cytochrome c oxidase
AT1G80270	PPR2-2
At1g80600	acetylornithine aminotransferase
AT2G01140	fructose-bisphosphate aldolase
At2g01460	ATP binding/kinase
AT2G02050	NADH dehydrogenase B18 subunit
AT2G02510	NADH dehydrogenase B12-2 subunit
AT2G03780	translin family protein
At2g04030	EMB1956 HSP88-1 heat shock protein
AT2G04340	At2g04340
AT2G04940	scramblase-related
AT2G05710	aconitate hydratase-2
At2g05710	ACON-1 aconitate hydratase
At2g05990	enoyl-(acyl-carrier protein) reductase (NADH)
AT2G07696	ribosomal protein S7 family protein
AT2G07698	alpha-2 subunit
AT2G07707	subunit 8 (At2g07707/AtMg00480)
AT2G07715	ribosomal protein L2
AT2G07727	cytochrome b
AT2G07734	ribosomal protein S4 (RPS4)
AT2G07741	subunit a (At2g07741/AtMg00410)
AT2G13560	NAD-dependent malic enzyme 1
At2g14170	MMSDH methylmalonate-semialdehyde dehydrogenase
AT2G14670	SUC8 (sucrose-proton symporter 8)
At2g14680	myosin heavy chain-related
AT2G16460	COX X6
AT2G16570	ATASE1 (Gln Amidophosphoribosyltransferase 1)
At2g17130	IDH-2 isocitrate dehydrogenase subunit 2
AT2G18330	AAA-type ATPase family
At2g18450	SDH1-2 succinate dehydrogenase (ubiquinone) flavoprotein subunit
AT2G18520	PPR5-2
AT2G19080	metaxin-related
AT2G19490	recA family protein
AT2G19680	subunit g (ATP20-1)
At2g19860	HXK2
AT2G20060	ribosomal protein L4 family protein
AT2G20360	NADH dehydrogenase 39 kDa subunit
At2g20420	succinyl-CoA ligase (GDP-forming) beta-chain
AT2G20450	60S ribosomal protein L14 (RPL14A)
AT2G20530	prohibitin-6
At2g20530	PRHB-2 prohibitin
AT2G20800	NDB4 (NAD(P)H dehydrogenase B4)
AT2G20940	At2g20940
AT2G21170	triose-phosphate isomerase
At2g21870	ATP Fad expressed protein ATP synthase Fad subunit
AT2G24200	cytosol aminopeptidase
AT2G24280	serine carboxypeptidase S28 family protein
At2g25140	heat shock protein 100
AT2G25830	YebC-related
At2g26080	GDP2 glycine dehydrogenase (decarboxylating), putative
AT2G27730	At2g27730 (plant specific complex I subunit)
At2g28000	RuBisCO subunit binding-protein alpha subunit
AT2G28430	At2g28430 (plant specific complex I subunit)
AT2G28900	OEP16 (outer plastid envelope protein 16-1)
AT2G29530	TIM10
At2g29550	TUB7 tubulin beta-7 chain
AT2G29990	NDA2 (NAD(P)H dehydrogenase A2)
At2g30870	GST F10 glutathione S-transferase
AT2G30920	ATCOQ3 (coenzyme Q 3)
AT2G30970	ASP1 (Aspartate aminotransferase 1)
AT2G31140	Peptidase S24/S26A/S26B/S26C family protein
AT2G31170	SYCO ARATH (cysteinyl t-RNA synthetase)
AT2G31240	TPR (tetratricopeptide repeat-containing protein)
AT2G31490	At2g31490 (plant specific complex I subunit)
AT2G31610	40S ribosomal protein S3 (RPS3A)
At2g31670	expressed protein, similar to NADH-ubiquinone oxidoreductase B16.6 subunit
At2g31725	expressed protein expressed protein
At2g33040	ATP3 ATP synthase gamma chain, mitochondrial (ATPC),
AT2G33150	PKT3 (peroxisomal 3-ketoacyl-coA thiolase 3)
At2g33210	HSP60-2 chaperonin
AT2G33220	NADH dehydrogenase B16.6 subunit
AT2G34630	GPPS (geranyl diphosphate synthase)
AT2G35010	ATO1 Thioredoxin O1
AT2G35120	GDH Glycine decarboxylase H subunit
At2g35240	DAG6 plastid developmental protein DAG
AT2G35370	GDH Glycine decarboxylase H subunit
AT2G35605	Unknown Protein, SWIB complex BAF60b domain-containing
AT2G35720	OWL1, HSP binding
AT2G36070	TIM44-2
At2g36460	fructose-bisphosphate aldolase
At2g36530	enolase
AT2G37020	translin family protein
AT2G37410	TIM17-2
AT2G37500	arginine biosynthesis protein ArgJ family
At2g37760	aldo/keto reductase family protein
At2g38280	FAC1
AT2G38400	AGT3 (alanine-glyoxylate aminotransferase 3)
AT2G38550	At2g38550, transmembrane protein
AT2G38660	tetrahydrofolate dehydrogenase/cyclohydrolase
At2g38660	tetrahydrofolate dehydrogenase/cyclohydrolase
AT2G38670	PECT1 (phosphorylethanolamine cytidylyltransferase 1)
At2g39795	mitochondrial glycoprotein family protein
AT2G40765	QCR10
AT2G40800	At2g40800
At2g41380	embryo-abundant protein-related
AT2G41600	mt glycoprotein family protein
AT2G42210	NADH dehydrogenase B14.7 subunit
AT2G42310	At2g42310/At3g57785-1 (plant specific complex I subunit)
AT2G42710	ribosomal protein L1 family protein
At2g43090	aconitase C-terminal domain-containing protein
At2g43400	Electron-transfer flavoprotein:ubiquinone oxidoreductase (ETFQO)
AT2G43750	OASB O-Acetylserine (thiol) lyase B
AT2G44065	ribosomal protein L2 family protein
At2g44350	citrate synthase
AT2G44640	At2g44640
AT2G45060	At2g45060
At2g45790	eukaryotic phosphomannomutase family protein
AT2G45930	At2g45930
AT2G46470	OXA1L (OXA1-like)
AT2G46505	SDH4
AT2G46540	Unknown protein
AT2G47380	COX Vc
At2g47510	FH-1 fumarate hydratase
At3g01280	VDAC1 porin
AT3G01480	CYP38 (cyclophilin 38)
AT3G01740	ribosomal protein L37
AT3G01790	ribosomal protein L13 family protein
AT3G01800	ribosome recycling factor family protein
At3g02090	MPPBETA MPP beta mitochondrial processing peptidase beta subunit
At3g02530	chaperonin, putative, similar
AT3G02780	IPP2 ( isopentenyl-pyrophosphate:dimethylallyl pyrophosphate-isomerase 2)
AT3G03070	NADH dehydrogenase 13 kDa subunit
AT3G03100	NADH dehydrogenase B17.2 subunit
AT3G03420	Ku70-binding family protein
AT3G03590	SWIB complex BAF60b domain-containing protein
AT3G03910	GDH3 (glutamate dehydrogenase 3)
At3g04120	GAPC glyceraldehyde-3-phosphate dehydrogenase
AT3G04840	40S ribosomal protein S3A (RPS3aA)
AT3G05560	60S ribosomal protein L22-2 (RPL22B)
AT3G05590	RPL18 (ribosomal protein L18)
AT3G05900	neurofilament protein-related
AT3G06050	PRXIIF (peroxiredoxin IIF)
AT3G06310	PGIV-1
At3g06400	CHR11 DNA-dependent ATPase
AT3G06483	PDK Pyruvate dehydrogenase kinase
At3g06850	BCKDC E2a branched chain alpha-keto acid dehydrogenase E2 subunit (din3),
AT3G07060	embryo defective 1974
At3g07480	expressed protein adrenodoxin
AT3G07568	At3g07568
At3g07770	HSP89-1 heat shock protein-related
At3g08550	elongation defective 1 protein / ELD1 protein
AT3G08580	AAC1 (ADP/ATP carrier 1)
At3g08590	2,3-biphosphoglycerate-independent phosphoglycerate mutase
AT3G08610	MWFE
AT3G08950	SCO1 homolog
AT3G09200	ribosomal protein L10 family
At3g09440	heat shock cognate 70 kDa protein 3 (HSC70-3)
At3g09810	IDH-3 isocitrate dehydrogenase
At3g09840	cell division cycle protein 48 (CDC48A)
AT3G10110	At3g10110/At1g18320-1 (plant specific complex I subunit)
AT3G10370	SDP6 (sugar-dependent 6)
AT3G10860	QCR8 (Isoforms: At3g10860, At5g05370)
At3g10920	MSD-1 superoxide dismutase (Mn), mitochondrial (SODA)
At3g11070	SAM50-1
At3g11820	syntaxin 121 (SYP121) / syntaxin-related protein (SYR1),
AT3G12260	NNADH dehydrogenase B14 subunit
At3g12390	nascent polypeptide associated complex alpha chain protein
At3g12580	HSP70 heat shock protein 70, putative
At3g12780	nuclear phosphoglycerate kinase
AT3G13110	SAT-3 Serine Acetyltransferase
At3g13160	PPR_3_4230001 pentatricopeptide (PPR)
At3g13470	HSP60-3c chaperonin
AT3G13845	At3g13845
AT3G13860	HSP60-3A
At3g13930	PDC E2-3 dihydrolipoamide S-acetyltransferase
At3g14415	(S)-2-hydroxy-acid oxidase
At3g14420	S)-2-hydroxy-acid oxidase
AT3G15000	similar to plastid developmental protein DAG
AT3G15020	malate dehydrogenase 2
At3g15290	HMB-CoADH-1 3-hydroxybutyryl-CoA dehydrogenase
AT3G15590	DNA-binding protein
At3g15640	COX 5b-2 cytochrome c oxidase family protein
At3g15660	glutaredoxin family protein
AT3G16480	MPPalpha-2
AT3G16700	Fumarylacetoacetate hydrolase
At3g17240	DHLP E3-3a dihydrolipoamide dehydrogenase 2
At3g17390	S-adenosylmethionine synthetase
AT3G17465	RPL3P (ribosomal protein L3 plastid)
At3g17820	GLN1-3 glutamine synthetase (GS1),
AT3G17910	SURF1 (SURFEIT 1)
AT3G18240	unknown protein
AT3G18410	NDUFB10-2: PDSW subunit Complex 1
AT3G18580	single-strand-binding family protein
At3g19895	expressed protein unknown protein
AT3G20000	TOM40
At3g20040	HXK4
AT3G20390	endoribonuclease L-PSP family protein
AT3G20970	NFU4( NFU domain protein 4)
At3g21110	phosphoribosylamidoimidazole-succinocarboxamide synthase
AT3G21400	At3g21400
At3g22110	20S proteasome alpha subunit C (PAC1) (PRC9)
AT3G22200	4-Aminobutyrate aminotransferase
AT3G22310	PMH1 Putative Mitochondrial RNA helicase 1
AT3G22330	PMH2 (putative mt RNA helicase 2)
AT3G22370	AOX1A Alternative oxidase 1A
At3g23940	dehydratase family, contains Pfam profile: PF00920
At3g23990	HSP60-3b chaperonin (CPN60)
AT3G24200	FAD/NAD(P)-binding oxidoreductase family protein
AT3G24570	peroxisomal membrane 22 kDa family protein
AT3G25520	ATL5 (ribosomal protein L5)
At3g25860	PDC E2-4 dihydrolipoamide S-acetyltransferase
AT3G26770	short-chain dehydrogenase/reductase (SDR) family protein
AT3G27080	TOM20-3
AT3G27240	cytochrome c1-2
AT3G27280	prohibitin-4
AT3G27380	SDH2-1
AT3G27570	sucrase/ferredoxin-like
AT3G27740	CARA (carbamoyl phosphate synthetase A)
AT3G27890	NQR (NADPH:quinone oxidoreductase)
At3g27930	Unknown protein
At3g28700	expressed protein, contains Pfam PF02636
At3g29360	UDP-glucose 6-dehydrogenase
At3g44300	nitrilase 2 (NIT2)
AT3G45030	40S ribosomal protein S20 (RPS20A)
At3g45300	IVD-2 isovaleryl-CoA-dehydrogenase (IVD),
At3g45740	hydrolase family protein
AT3G45770	polyketide synthase, enoylreductase family
AT3G46100	ATHRS1 (histidyl-tRNA synthetase 1)
AT3G46430	6 kDa subunit (At3g46430/At5g59613)
At3g46560	TIM9 mitochondrial import inner membrane translocase (TIM9)
AT3G47520	malate dehydrogenase 3
AT3G47630	At3g47630
AT3G47833	SDH7-1
AT3G47930	GLDH (L-galactono-1,4-lactone dehydrogenase)
At3g48000	aldehyde dehydrogenase (ALDH2),
At3g48170	betaine-aldehyde dehydrogenase
At3g48560	acetolactate synthase, chloroplast
AT3G48680	CAL2 (gamma carbonic anhydrase like 2)
AT3G48850	Phosphate transporter
At3g48870	ATP-dependent Clp protease
AT3G49010	40S ribosomal protein
AT3G49080	ribosomal protein S9 family protein
AT3G49240	PPR/TPR like helical
At3g49680	BCAT-7 branched-chain amino acid aminotransferase 3
AT3G50930	BCS1 (cytochrome bc1 synthesis)
At3g50940	BCS-1-like
At3g52200	PDC E2-5 dihydrolipoamide S-acetyltransferase
AT3G52230	At3g52230
At3g52300	ATP7 ATP synthase D chain-related
At3g52570	expressed protein, contains Interpro entry IPR000379
AT3G52730	QCR9
At3g52930	fructose-bisphosphate aldolase
AT3G52950	CBS domain-containing protein
At3g52960	peroxiredoxin type 2
At3g53580	diaminopimelate epimerase family protein
AT3G54110	PUMP1 (plant uncoupling mt protein 1)
At3g55010	Phosphoribosylformylglycin- amidine cyclo-ligase
AT3G55400	OVA1 (ovule abortion 1)
AT3G55410	E1-2 (oxoglutarate dehydrogenase)
At3g55440	triosephosphate isomerase, cytosolic, putative
At3g55605	mitochondrial glycoprotein family protein / MAM33 family protein
At3g55800	SBPASE Encodes the chloroplast enzyme sedoheptulose-1,7-bisphosphatase (SBPase),
AT3G56070	ROC2 (rotamase cyclophilin 2)
At3g56370	leucine-rich repeat transmembrane protein kinase
AT3G56430	TIM21 like
AT3G57050	CBL (cystathionine beta-lyase)
AT3G57785	At2g42310/At3g57785-2 (plant specific complex I subunit)
AT3G58140	phenylalanyl-tRNA synthetase class IIc family protein
AT3G58610	ketol-acid reductoisomerase
AT3G58750	CSY2 (citrate synthase 2), peroxisomal
At3g58840	expressed protein putative protein
AT3G59760	OASC (O-acetylserine (thiol) lyase isoform C)
At3g59980	tRNA-binding region domain-containing protein
AT3G60100	CSY5 (citrate synthase 5)
At3g60750	transketolase, putative
At3g61440	ARATH;BSAS3;1 CYSC1 encodes a cysteine synthase isomer
At3g62030	peptidyl-prolyl cis-trans isomerase, chloroplast / cyclophilin / rotamase / cyclosporin A-binding
At3g62530	PBS lyase HEAT-like repeat-containing protein
AT3G62790	15 kDa-1 subunit
At3g62810	complex 1 family protein / LVR family protein
At3g63150	MIRO2
AT4G00026	TIM21 like
AT4G00290	mechanosensitive ion channel domain-containing protein
AT4G00570	NAD-dependent malic enzyme 2
AT4G00585	At4g00585 (plant specific complex I subunit)
AT4G00860	COX X2-1
AT4G01100	ANT1 (adenine nucleotide transporter 1)
AT4G02580	24 kDa subunit
At4g02930	elongation factor Tu, putative
AT4G03140	NAD(P)-binding Rossmann-fold superfamily protein
At4g03930	pectin methylesterase
AT4G04180	AAA-type ATPase family
AT4G05020	NDB2 (NAD(P)H dehydrogenase B2)
AT4G05160	4-coumarate-CoA ligase
AT4G05400	At4g05400
At4g08390	APX-4 L-ascorbate peroxidase, stromal (sAPX),
AT4G08870	arginase
At4g08900	arginase
At4g09320	nucleoside diphosphate kinase 1 (NDK1),
At4g10040	CYTCb cytochrome c, putative, similar to cytochrome c
At4g11010	NDPK3-1 nucleoside diphosphate kinase 3
AT4G11060	mt single-stranded DNA binding protein
At4g11120	translation elongation factor Ts (EF-Ts),
At4g12130	Glycine cleavage T-protein family
AT4G12340	At4g12340
At4g13850	glycine-rich RNA-binding protein (GRP2)
AT4G14430	peroxisomal delta3, delta2-enoyl CoA isomerase
AT4G14695	Unknown protein
At4g14930	acid phosphatase survival protein SurE
At4g14960	TUA6b tubulin alpha-6 chain (TUA6)
AT4G15940	fumarylacetoacetate hydrolase family protein
AT4G16450	At4g16450 (plant specific complex I subunit)
AT4G16800	enoyl-CoA hydratase
AT4G17260	L-lactate dehydrogenase
AT4G17300	NS1 (asparagine-tRNA ligase)
AT4G17520	nuclear RNA-binding protein
AT4G18360	(S)-2-hydroxy-acid oxidase, peroxisomal
AT4G18650	transcription factor-related
AT4G19540	INDL (iron-sulfur protein required for NADH dehydrogenase)-like
AT4G19880	glutathione S-transferase family protein
AT4G20150	At4g20150 (plant specific complex I subunit)
At4g20890	TUB9 tubulin beta-9 chain
At4g20930	HIBDH-5 3-hydroxyisobutyrate dehydrogenase
AT4G21105	COX X4
AT4G21460	unknown protein
AT4G22310	Unknown protein
At4g22670	tetratricopeptide repeat (TPR)-containing protein
At4g23100	GSH1 glutamate-cysteine ligase
AT4G23620	50S ribosomal protein-related
AT4G23885	Unknown protein
AT4G23900	NDPK4 Nucleoside diphosphate kinase 4
At4g24280	CPHSC70-1 heat shock protein 70
AT4G24800	MA3 domain-containing protein
AT4G24830	arginosuccinate synthase family
AT4G25100	Fe-SOD
AT4G25130	peptide methionine sulfoxide reductase
AT4G26210	subunit g (ATP20-2)
At4g26310	elongation factor P (EF-P) family protein
At4g26370	antitermination NusB domain-containing protein
AT4G26410	At4g26410
AT4G26780	Co-chaperone grpE
AT4G26910	KDC E2-4a 2-oxoacid dehydrogenase family protein
AT4G26970	aconitate hydratase-1
AT4G27070	TSB2 (tryptophan synthase beta subunit 2)
At4g27585	band 7 family protein, similar to stomatin-like protein
AT4G28360	ribosomal protein L22 family protein
AT4G28390	AAC3 (ADP/ATP carrier 3)
At4g28510	PRHB-4 prohibitin, putative
AT4G29120	6-phosphogluconate dehydrogenase
At4g29130	HXK1
AT4G29480	subunit g (ATP20-3)
AT4G29840	threonine synthase
AT4G29920	HSP-related
AT4G30010	ATP17 (plant specific)
At4g30920	cytosol aminopeptidase family protein
AT4G30930	ribosomal RPL21M protein
AT4G31460	ribosomal protein L28 family protein
AT4G31700	RPS6 (ribosomal protein S6)
At4g31810	E-CoAH-4 enoyl-CoA hydratase
AT4G31990	ASP5 (aspartate aminotransferase 5)
AT4G32210	SDH3-2
AT4G32360	pyridine nucleotide-disulphide oxidoreductase family
AT4G32470	QCR7-1 (14 kDa)
At4g32605	no apical meristem (NAM) family protein (transcription factor)
At4g32610	mitochondrial glycoprotein family protein / MAM33 family protein
AT4G33010	AtGLDP1 (Arabidopsis thaliana glycine decarboxylase P-protein 1)
AT4G33030	SQD1 (UDPsulfoquinovose synthase)
AT4G34030	MCCB (3-methylcrotonyl-CoA carboxylase)
At4g34200	D-3-phosphoglycerate dehydrogenase
At4g34350	ISPH Arabidopsis ISPH is involved in the plastid
AT4G34700	B22
AT4G35000	APX-3 L-Ascorbate peroxidase
AT4G35090	CAT2 (catalase 2)
At4g35260	IDH-4 isocitrate dehydrogenase subunit 1
At4g35460	thioredoxin reductase 1
AT4G35650	IDH-3 Isocitrate dehydrogenase subunit 3
At4g35830	ACON-3 aconitate hydratase
At4g35850	pentatricopeptide (PPR) repeat-containing protein
At4g36400	D-2-hydroxyglutarate dehydrogenase
At4g36420	RPL12I ribosomal protein L12 family protein 50S
AT4G36680	PPR5-1
At4g37830	COX 6a cytochrome c oxidase-related
At4g37910	MTHSC70-1 HSP70-4 heat shock protein 70
AT4G37930	SHM1 (serine transhydroxymethyltransferase 1)
At4g38150	PPR_4_16866199 pentatricopeptide (PPR)
At4g38510	vacuolar ATP synthase subunit B
At4g38740	peptidyl-prolyl cis-trans isomerase / cyclophilin / rotamase / cyclosporin A-binding protein
AT4G38760	At4g38760
At4g39260	glycine-rich RNA-binding protein 8 (GRP8)
AT4G39460	SAMC1 (S-adenosylmethionine carrier 1)
AT4G39660	AGT2 (alanine-glyoxylate aminotransferase 2)
AT4G39690	At4g39690, mitofilin related
AT4G39880	ribosomal protein L23 family protein
At5g01410	ATPDX1.3 Encodes a protein predicted to function in tandem with PDX2
At5g02050	mitochondrial glycoprotein family protein / MAM33 family protein
At5g02490	heat shock cognate 70 kDa protein 2 (HSC70-2)
At5g02500	heat shock cognate 70 kDa protein 1 (HSC70-1)
AT5G02740	ribosomal protein S24e family protein
AT5G03290	isocitrate dehydrogenase-5
At5g03630	monodehydroascorbate reductase
At5g05520	SAM50-2
AT5G05730	ASA1 (anthranilate synthase alpha-1 subunit 1)
At5g05990	mitochondrial glycoprotein family protein / MAM33 family protein
AT5G06580	FAD linked oxidase family protein
At5g07440	glutamate dehydrogenase 2
At5g08040	TOM5
AT5G08060	Unknown protein
AT5G08300	succinyl-CoA ligase (GDP-forming) alpha
AT5G08530	51 kDa subunit
At5g08670	ATP2a ATP synthase beta chain 1
AT5G08680	ATP2 ATP synthase
At5g09420	OM64
AT5G09450	PPR4
At5g09590	HSP70-5 heat shock protein 70
At5g09650	inorganic pyrophosphatase family protein
AT5G09660	PMDH2 Peroxisomal NAD-malate dehydrogenase 2
AT5G09770	ribosomal protein L17 family protein
At5g09810	ACT2/7 actin 7 (ACT7) / actin 2
At5g10450	GRF6 14-3-3 protein GF14 lambda (GRF6)
AT5G10730	At5g10730
AT5G10860	Cystathionine beta-synthase (CBS) family protein
At5g11520	aspartate aminotransferase
AT5G11690	TIM17-3
AT5G11770	PSST
AT5G12040	Nitrilase/cyanide hydratase, apolipoprotein N-acyltransferase family
At5g12290	DGS1
AT5G13420	transaldolase
AT5G13430	iron-sulfur protein (Isoforms: At5g13430, At5g13440)
At5g13450	OSCP ATP synthase delta chain
AT5G13490	AAC2 (ADP/ATP carrier 2)
AT5G14040	mt phosphate transporter
At5g14200	IMDH-3 3-isopropylmalate dehydrogenase
AT5G14220	PPO2 (putative protoporphyrinogen oxidase)
At5g14590	IDHP-3 isocitrate dehydrogenase
At5g14780	formate dehydrogenase (FDH)
At5g15090	VDAC3 porin, putative
AT5G15450	CLPB3 (casein lytic proteinase B3)
At5g15650	reversibly glycosylated polypeptide-2 (RGP2),
AT5G15980	PPR7
At5g16050	GRF 5 14-3-3 protein GF 14 upsilon
AT5G16290	acetolactate synthase small subunit
At5g16390	biotin carboxyl carrier protein 1 (BCCP1),
At5g16510	reversibly glycosylated polypeptide
AT5G16930	AAA-type ATPase protein
At5g17000	NADP-dependent oxidoreductase
At5g17310	UTP--glucose-1-phosphate uridylyltransferase
At5g17770	NADH:cytochrome B5 reductase
At5g18170	glutamate dehydrogenase 1 (GDH1),
AT5G18800	PGIV-2
At5g19370	rhodanese-like domain-containing protein
AT5G19550	ASP2 (aspartate aminotransferase 2)
AT5G19760	DTC (dicarboxylate/tricarboxylate carrier)
AT5G20080	NADH-cytochrome b5 reductase
AT5G20090	At5g20090
At5g20470	myosin, putative,
At5g20720	20 kDa chaperonin, chloroplast (CPN21) (CHCPN10) (CPN20)
At5g20890	chaperonin, putative
At5g22350	ELM1
At5g23140	ClpP2 ATP-dependent Clp protease proteolytic subunit
AT5G23250	succinyl-CoA ligase (GDP-forming) alpha
AT5G23300	dihydroorotate dehydrogenase
AT5G23900	60S ribosomal protein L13 (RPL13D)
AT5G24110	WRKY30 transcription factor
AT5G24165	Unknown protein
AT5G25450	QCR7-2 Complex III ubiquinol-cytochrome C reductase complex 14 kDa subunit
AT5G25940	early nodulin-related
AT5G26780	SHM2 (serine hydroxymethyltransferase 2)
AT5G26860	LON1 (LON protease 1)
At5g27380	GSH2 glutathione synthetase (GSH2),
AT5G27540	MIRO1 (Miro-related GTP-ase 1)
AT5G27760	hypoxia-responsive family protein
AT5G27770	60S ribosomal protein L22 (RPL22C)
At5g28540	BiP-1 luminal binding protein 1
At5g35360	MCCase alpha-2 acetyl-CoA carboxylase
At5g35370	similar to lectin protein kinase family protein
AT5G37510	75 kDa subunit
At5g37510	EMB1467 NDUFS1 NADH-ubiquinone dehydrogenase
AT5G37590	TPR-like
At5g37600	GLN1-1 glutamine synthetase
At5g38480	GRF3 14-3-3 protein GF14 psi (GRF3)
AT5G39410	saccharopine dehydrogenase
At5g40610	glycerol-3-phosphate dehydrogenase (NAD+)
At5g40650	SDH2-2 succinate dehydrogenase
At5g40770	PRHB-6 prohibitin
AT5G40810	cytochrome c1-1
AT5G40930	TOM20-4
AT5G41480	dihydrofolate synthetase
AT5G41670	6-phosphogluconate dehydrogenase family protein
AT5G41685	TOM7-1
AT5G41800	amino acid transporter family protein
At5g41970	similar to expressed protein
AT5G42020	BiP-2 Luminal binding protein 1
AT5G42150	Glutathione S-transferase family protein
At5g42980	thioredoxin H-type 3 (TRX-H-3) (GIF1)
AT5G43010	26S proteasome AAA-ATPase subunit RPT4a
At5g43430	ETF beta electron transfer flavoprotein beta subunit family protein
AT5G43970	TOM22-V
AT5G44140	ATPHB7 Prohibitin 7
At5g44340	TUB4 tubulin beta-4 chain
AT5G44730	haloacid dehalogenase-like
AT5G46180	ornithine-delta-aminotransferase
AT5G46800	mt carnitine acyl carrier-like
At5g47030	ATP16 ATP synthase delta' chain, mitochondrial
AT5G47210	nuclear RNA-binding protein
AT5G47320	RPS19 (ribosomal protein S19)
AT5G47570	ASHI
AT5G47890	B8
AT5G48030	GFA2 (gametophytic factor 2)
At5g48180	kelch repeat-containing protein
AT5G49210	Unknown protein
AT5G49555	FAD/NAD(P)-binding oxidoreductase family
At5g49910	heat shock protein 70 / HSP70 (HSC70-7),
At5g50370	adenylate kinase
At5g50850	PDC E1 beta-3 pyruvate dehydrogenase E1 component beta subunit
At5g50920	ATP-dependent Clp protease ATP-binding subunit / ClpC
AT5G50950	FUM Fumarase
AT5G51040	Unknown protein
AT5G51220	ubiquinol-cytochrome C chaperone family protein
AT5G51740	peptidase M48 family protein
At5g52280	protein transport protein-related
AT5G52520	tRNA ligase activity
AT5G52840	NADH dehydrogenase B13 subunit
AT5G53070	ribosomal protein L9 family protein
AT5G53350	CLPX (nucleoside-triphosphatase)
AT5G53650	At5g53650
At5g54100	band 7 family protein, similar to stomatin-like protein
At5g54580	RNA recognition motif (RRM)-containing protein
At5g55070	KDC E2-5 2-oxoacid dehydrogenase family protein
At5g55200	co-chaperone grpE protein
At5g55610	Unknown protein
At5g55660	expressed protein
At5g56030	Heat shock protein 81-2
AT5G56500	TCP-1 (HSP60 family)
AT5G56910	protease inhibitor
AT5G57300	UBiE UbiE/COQ5 Methyltransferase
AT5G57490	VDAC4 (voltage dependent anion channel 4)
At5g58070	lipocalin, putative, similar to temperature stress-induced lipocalin
AT5G58220	TTL (Transthyretin-Like protein)
At5g58330	MDH-9a malate dehydrogenase (NADP),
At5g59440	thymidylate kinase family protein
At5g59880	actin-depolymerizing factor 3 (ADF3)
At5g60730	Anion transport
AT5G61030	GR-RBP3 (glycine-rich RNA-binding protein 3)
AT5G62050	OXA1 (protein transmembrane transporter)
At5g62530	delta-1-pyrroline-5-carboxylate dehydrogenase (P5CDH),
AT5G62575	SDH7-2
At5g62690	TUB2 tubulin beta-2/beta-3 chain
At5g63400	adenylate kinase
AT5G63510	CAL1 (gamma carbonic anhydrase like 1)
At5g63620	oxidoreductase, zinc-binding dehydrogenase family protein
AT5G63890	ATHDH (histidinol dehydrogenase)
AT5G64670	ribosomal protein L15 family protein
AT5G65720	NIFS1 Nitrogen fixation S homolog 1
AT5G65750	OGDC E1 2-Oxoglutarate dehydrogenase component
At5g66120	3-dehydroquinate synthase
AT5G66510	CA3 (gamma carbonic anhydrase 3)
At5g66760	SDH1-1 succinate dehydrogenase (ubiquinone) flavoprotein subunit
AT5G66860	similar to 50S ribosomal protein-related
AT5G67490	Unknown protein
AT5G67500	VDAC2 (voltage dependent anion channel 2)
At5g67590	NDUFS4 NADH-ubiquinone oxidoreductase-related
ATCG00120	ATPA ATPase a-subunit
AtCg00480	ATPB atpB chloroplast-encoded gene for beta subunit of ATP synthase
ATMG00060	ND5 (AtMg00060/AtMg00513/AtMg00665)
ATMG00070	NADH dehydrogenase subunit 9
ATMG00090	ribosomal protein S3
ATMG00160	COX2 Cytochrome c oxidase subunit 2
ATMG00270	ND6
ATMG00285	ND2 (AtMg00285/AtMg01320)
ATMG00480	subunit 8 (At2g07707/AtMg00480)
AtMg00510	NAD7 ND7 NADH dehydrogenase subunit 7
ATMG00516	ND1
ATMG00580	ND4
ATMG00640	subunit b
ATMG00990	ND3
AtMg01190	ATP1 ATP1 ATPase subunit 1 ATP synthase subunit alpha
At2g39730	Rubisco activase
At4g13360	ATP-dependent caseinolytic (Clp) protease/crotonase family protein
At2g21330	Fructose-bisphosphate aldolase
At4g38970	Fructose-bisphosphate aldolase
AT4G36540	BR enhanced expression 2 (BEE2)
AT3G14590	Calcium-dependent lipid-binding (CaLB domain) family protein
At5g56010	HSP90-3
AT5G50810	TIM8
At4g05390	A root-type ferredoxin:NADP(H) oxidoreductase
At1g24360	NAD(P)-binding Rossmann-fold superfamily protein
AT5G04590	Sulfite reductase
AT3G63190	ribosome recycling factor
AT5G17710	Co-chaperone GrpE family protein
AT1G15140	FAD/NAD(P)-binding oxidoreductase
AT1G36390	Co-chaperone GrpE family protein
AT2G37660	NAD(P)-binding Rossmann-fold superfamily protein
AT1G30510	A root-type ferredoxin:NADP(H) oxidoreductase.
AT2G36950	Heavy metal transport/detoxification superfamily protein
AT2G30860	glutathione S-transferase PHI 9
AT3G54660	glutathione reductase
AT1G79530	glyceraldehyde-3-phosphate dehydrogenase
AT2G04400	Aldolase-type TIM barrel family protein
AT2G19940	oxidoreductases
AT4G33680	Pyridoxal phosphate (PLP)-dependent transferases superfamily protein
AT1G02920	glutathione S-transferase 7
AT1G02930	glutathione S-transferase 6
AT3G06790	plastid developmental protein DAG
AT1G48420	D-cysteine desulfhydrase
AT3G12490	cystatin B
AT1G54280	haloacid dehalogenase-like hydrolase
AT2G43360	Radical SAM superfamily protein, BIOTIN AUXOTROPH 2 (BIO2)
AT3G26760	NAD(P)-binding Rossmann-fold superfamily protein;
AT3G30290	cytochrome P450
AT3G61530	Phosphoenolpyruvate carboxylase family protein;
AT4G33030	sulfoquinovosyldiacylglycerol 1
AT2G37190	Ribosomal protein L11 family protein
AT5G12100	pentatricopeptide (PPR) repeat-containing protein
AT3G46870	pentatricopeptide (PPR) repeat-containing protein
AT4G36580	AAA-type ATPase family protein
AT3G03060	P-loop containing nucleoside triphosphate hydrolases superfamily protein
AT5G54770	thiazole biosynthetic enzyme
AT1G12230	Aldolase superfamily protein
AT1G07750	RmlC-like cupins superfamily protein
AT1G01980	FAD-binding Berberine family protein
AT1G65540	LETM1-like protein
AT1G73980	Phosphoribulokinase
AT1G74240	Mitochondrial substrate carrier family protein
AT1G01790	KEA1 K+ Efflux Antiporter 1
AT1G05205	unknown protein
AT1G06950	TIC110 Translocon inner envelope membrane of chloroplast 110
AT1G07890	ascorbate peroxidase 1
AT1G15220	cytochrome c biogenesis protein family
AT1G15500	NTT2 Plastidic ATP/ADP antiporter 2
AT1G15690	Inorganic H pyrophosphatase family protein
AT1G20430	unknown protein
AT1G22520	Unknown protein
AT1G22780	RPS18A Cytosolic Ribosomal Protein S18A
AT1G27400	RPL17A Cytosolic Ribosomal Protein L17A
AT1G42960	Unknown protein
AT1G43800	Putative stearoyl-ACP desaturase
AT1G44170	ALDH4 Aldehyde dehydrogenase 4
AT1G44575	PsbS Photosystem II 22kDa protein
AT1G54270	EIF4A-2 translation initiation factor ATP-dependent helicase
AT1G55900	TIM50 Translocase Inner Membrane 50
AT1G56070	Putative translation elongation factor
AT1G69840	Band 7 family protein
AT1G69880	TRX8 Thioredoxin H-type 8
AT1G76160	SKS5 Type I multi-copper oxidase
AT1G77590	LACS9 Long chain acyl-CoA synthetase 9
AT1G79550	PGK Phosphoglycerate kinase
AT2G06850	XTH4 Xyloglucan endoglucosylase hydrolase
AT2G15290	TIC21 Translocon inner envelope membrane of chloroplast 21
AT2G16360	RPS25A Cytosolic Ribosomal Protein S25A
AT2G22500	AtDIC1 Dicarboxylate Carrier
AT2G26140	FTSH4 ATP-dependent peptidase
AT2G29080	FTSH3 ATP-dependent peptidase
AT2G36500	Unknown protein, Phox/Bemp1 (PB1) domain-containing protein
AT2G43780	Unknown protein
AT2G44450	BGLU15 b-Glucosidase 15
AT3G01130	Unknown protein
AT3G08530	CHC2 Putative heavy chain of clatherin complex
AT3G09680	RPS23A Cytosolic Ribosomal Protein S23A
AT3G10690	Putative subunit A DNA gyrase
AT3G16240	TIP2 Tonoplast integral membrane protein 2
AT3G23150	AtETR2 Putative ethylene receptor S/T protein kinase
AT3G23730	XTH16 Xyloglucan endotransglucosylase-hydrolase
AT3G27620	AOX1C Alternative oxidase 1C
AT3G52140	Tetratricopeptide repeat (TPR)-containing protein
AT3G52420	OEP7 Outer Envelope membrane protein 7
AT3G53610	RAB-E1a RAB-E-class small GTPase
AT3G59820	Mdm38-1 Component of mitochondrial protein export machinery
AT4G01660	ABC1 ABC Transporter 1
AT4G13940	SAHH1 S-adenosyl-L-homocysteine hydrolase 1
AT4G17085	Unknown protein
AT4G17140	Unknown protein, Pleckstrin homology (PH) domain-containing protein
AT4G17530	RAB-D2c RAB-D-class small GTPase
AT4G21490	NDB3 Alternative NAD(P)H dehydrogenase
AT4G26620	Putative sucrose cleavage protein
AT4G30270	XTH24 Xyloglucan endotransglucosylase-hydrolase
AT4G33520.2	PAA1 Metal-transporting P-type ATPase 1
AT4G35860	RAB-B1c RAB-B-class small GTPase
AT4G39740	HCC2 Mitochondrial copper chaperone involved in CV assembly
AT5G07340	CNX2 Calnexin-like protein of unknown function
AT5G09270	Unknown protein
AT5G09500	RPS15C Cytosolic Ribosomal Protein S15C
AT5G10840	TMN8 TM9-type membrane protein
AT5G13610	Unknown protein
AT5G14105	NADH dehydrogenase plant specific subunit 8.5kDa
AT5G15640	Putative mitochondrial substrate carrier family protein (MCSF)
AT5G15910	NAD-dependent epimerase/dehydratase
AT5G16150	pGlcT Plastidic glucose translocator
AT5G16870	Putative peptidyl-tRNA hydrolase
AT5G17920	Cobalamin-independent synthase family protein
AT5G19770	TUA3 Tubulin a-3 chain
AT5G24050	Unknown protein
AT5G24650	AtPRAT2.2 Mitochondrial import inner membrane translocase subunit
AT5G25460	Unknown protein
AT5G27395	Unknown protein
AT5G56000	HSP81-3 Heat shock protein 3 81 kDa protein
AT5G58270	ABC transporter of the mitochondrion 3
AT5G61310	COX5c Cytochrome c oxidase subunit 5c
AT5G61790	CNX1 Calnexin-like protein of unknown function
AT5G62390	BAG7 BAG-type chaperone regulator
AT5G62740	HIR4 HIR-type protein of unknown function, associated with RPS2
AT5G64290	DiT2 Plastidic glutamate/malate-translocator 2
ATMG00900	ABCI3 ABC protein
AT1G32400	tobamovirus multiplication 2A

## Sheet: Table S1B
Accession	Name	Physiological function
AT1G04630	NADH dehydrogenase B16.6 subunit	a) oxidative phosphorylation
AT1G08480	SDH6	a) oxidative phosphorylation
AT1G14450	B12-1	a) oxidative phosphorylation
AT1G15120	QCR6-1, Hinge protein	a) oxidative phosphorylation
AT1G16700	TYKY-2	a) oxidative phosphorylation		FunCat	#
AT1G18320	At3g10110/At1g18320-2 (plant specific complex I subunit)	a) oxidative phosphorylation		A	119
AT1G19580	CA1 (gamma carbonic anhydrase 1)	a) oxidative phosphorylation		B	33
AT1G22450	COX 6b-1 Cytochrome c oxidase subunit 6b	a) oxidative phosphorylation		C	50
AT1G22840	cytochrome c	a) oxidative phosphorylation		D	31
AT1G47260	CA2 (gamma carbonic anhydrase 2)	a) oxidative phosphorylation		E	66
AT1G47420	SDH5	a) oxidative phosphorylation		F	136
AT1G49140	PDSW-2	a) oxidative phosphorylation		G	69
AT1G51650	epsilon subunit	a) oxidative phosphorylation			504
AT1G51980	MPPalpha-1	a) oxidative phosphorylation
AT1G67350	At1g67350 (plant specific complex I subunit)	a) oxidative phosphorylation
AT1G67785	At1g67785 (plant specific complex I subunit)	a) oxidative phosphorylation
AT1G68680	At1g68680 (plant specific complex I subunit)	a) oxidative phosphorylation
AT1G72170	At1g72170 (plant specific complex I subunit)	a) oxidative phosphorylation
AT1G76200	AGGG	a) oxidative phosphorylation
AT1G79010	NADH dehydrogenase 23 kDa subunit	a) oxidative phosphorylation
AT1G80230	COX 5b-1 Cytochrome c oxidase	a) oxidative phosphorylation
AT2G02050	NADH dehydrogenase B18 subunit	a) oxidative phosphorylation
AT2G02510	NADH dehydrogenase B12-2 subunit	a) oxidative phosphorylation
AT2G07698	alpha-2 subunit	a) oxidative phosphorylation
AT2G07707	subunit 8 (At2g07707/AtMg00480)	a) oxidative phosphorylation
AT2G07727	cytochrome b	a) oxidative phosphorylation
AT2G07741	subunit a (At2g07741/AtMg00410)	a) oxidative phosphorylation
AT2G16460	COX X6	a) oxidative phosphorylation
AT2G18450	SDH1-2	a) oxidative phosphorylation
AT2G19680	subunit g (ATP20-1)	a) oxidative phosphorylation
AT2G20360	NADH dehydrogenase 39 kDa subunit	a) oxidative phosphorylation
AT2G20800	NDB4 (NAD(P)H dehydrogenase B4)	a) oxidative phosphorylation
AT2G21870	ATP synthase 24kDa subunit	a) oxidative phosphorylation
AT2G27730	At2g27730 (plant specific complex I subunit)	a) oxidative phosphorylation
AT2G28430	At2g28430 (plant specific complex I subunit)	a) oxidative phosphorylation
AT2G29990	NDA2 (NAD(P)H dehydrogenase A2)	a) oxidative phosphorylation
AT2G31490	At2g31490 (plant specific complex I subunit)	a) oxidative phosphorylation
At2g31670	expressed protein, similar to NADH-ubiquinone oxidoreductase B16.6 subunit	a) oxidative phosphorylation
AT2G33040	ATP3 ATP synthase gamma chain, mitochondrial (ATPC),	a) oxidative phosphorylation
AT2G33220	NADH dehydrogenase B16.6 subunit	a) oxidative phosphorylation
AT2G40765	QCR10	a) oxidative phosphorylation
AT2G42210	NADH dehydrogenase B14.7 subunit	a) oxidative phosphorylation
AT2G42310	At2g42310/At3g57785-1 (plant specific complex I subunit)	a) oxidative phosphorylation
AT2G46505	SDH4	a) oxidative phosphorylation
AT2G47380	COX Vc	a) oxidative phosphorylation
AT3G02090	MPPBETA MPP beta mitochondrial processing peptidase beta subunit	a) oxidative phosphorylation
AT3G03070	NADH dehydrogenase 13 kDa subunit	a) oxidative phosphorylation
AT3G03100	NADH dehydrogenase B17.2 subunit	a) oxidative phosphorylation
AT3G06310	PGIV-1	a) oxidative phosphorylation
AT3G08610	MWFE	a) oxidative phosphorylation
AT3G10110	At3g10110/At1g18320-1 (plant specific complex I subunit)	a) oxidative phosphorylation
AT3G10860	QCR8 (Isoforms: At3g10860, At5g05370)	a) oxidative phosphorylation
AT3G12260	NNADH dehydrogenase B14 subunit	a) oxidative phosphorylation
AT3G15640	COX 5b-2 Cytochrome c oxidase	a) oxidative phosphorylation
AT3G16480	MPPalpha-2	a) oxidative phosphorylation
AT3G18410	NDUFB10-2: PDSW subunit Complex 1	a) oxidative phosphorylation
AT3G22370	AOX1A Alternative oxidase 1A	a) oxidative phosphorylation
AT3G27240	cytochrome c1-2	a) oxidative phosphorylation
AT3G27380	SDH2-1	a) oxidative phosphorylation
AT3G46430	6 kDa subunit (At3g46430/At5g59613)	a) oxidative phosphorylation
AT3G47833	SDH7-1	a) oxidative phosphorylation
AT3G47930	GLDH (L-galactono-1,4-lactone dehydrogenase)	a) oxidative phosphorylation
AT3G48680	CAL2 (gamma carbonic anhydrase like 2)	a) oxidative phosphorylation
AT3G52300	ATP7 ATP synthase D chain-related	a) oxidative phosphorylation
AT3G52730	QCR9	a) oxidative phosphorylation
AT3G57785	At2g42310/At3g57785-2 (plant specific complex I subunit)	a) oxidative phosphorylation
AT3G62790	15 kDa-1 subunit	a) oxidative phosphorylation
At3g62810	complex 1 family protein / LVR family protein	a) oxidative phosphorylation
AT4G00585	At4g00585 (plant specific complex I subunit)	a) oxidative phosphorylation
AT4G00860	COX X2-1	a) oxidative phosphorylation
AT4G02580	24 kDa subunit	a) oxidative phosphorylation
AT4G05020	NDB2 (NAD(P)H dehydrogenase B2)	a) oxidative phosphorylation
AT4G10040	CYTC-2 Cytochrome C-2)	a) oxidative phosphorylation
AT4G16450	At4g16450 (plant specific complex I subunit)	a) oxidative phosphorylation
AT4G20150	At4g20150 (plant specific complex I subunit)	a) oxidative phosphorylation
AT4G21105	COX X4	a) oxidative phosphorylation
AT4G26210	subunit g (ATP20-2)	a) oxidative phosphorylation
AT4G29480	subunit g (ATP20-3)	a) oxidative phosphorylation
AT4G30010	ATP17 (plant specific)	a) oxidative phosphorylation
AT4G32210	SDH3-2	a) oxidative phosphorylation
AT4G32470	QCR7-1 (14 kDa)	a) oxidative phosphorylation
AT4G34700	B22	a) oxidative phosphorylation
AT4G37830	COX 6a Cytochrome c oxidase-related	a) oxidative phosphorylation
AT5G08530	51 kDa subunit	a) oxidative phosphorylation
AT5G08670	beta subunit (Isoforms: At5g08670, At5g08680, At5g08690)	a) oxidative phosphorylation
AT5G08680	ATP2 ATP synthase	a) oxidative phosphorylation
AT5G11770	PSST	a) oxidative phosphorylation
AT5G13430	iron-sulfur protein (Isoforms: At5g13430, At5g13440)	a) oxidative phosphorylation
AT5G13450	OSCP	a) oxidative phosphorylation
AT5G18800	PGIV-2	a) oxidative phosphorylation
AT5G25450	QCR7-2 Complex III ubiquinol-cytochrome C reductase complex 14 kDa subunit	a) oxidative phosphorylation
AT5G37510	75 kDa subunit	a) oxidative phosphorylation
AT5G40650	SDH2-2	a) oxidative phosphorylation
AT5G40810	cytochrome c1-1	a) oxidative phosphorylation
AT5G47030	ATP16 ATP synthase	a) oxidative phosphorylation
AT5G47570	ASHI	a) oxidative phosphorylation
AT5G47890	B8	a) oxidative phosphorylation
AT5G52840	NADH dehydrogenase B13 subunit	a) oxidative phosphorylation
AT5G62575	SDH7-2	a) oxidative phosphorylation
AT5G63510	CAL1 (gamma carbonic anhydrase like 1)	a) oxidative phosphorylation
AT5G66510	CA3 (gamma carbonic anhydrase 3)	a) oxidative phosphorylation
AT5G66760	SDH1-1 succinate dehydrogenase (ubiquinone) flavoprotein subunit	a) oxidative phosphorylation
AT5G67590	NDUFS4 NADH-ubiquinone oxidoreductase-related	a) oxidative phosphorylation
ATMG00060	ND5 (AtMg00060/AtMg00513/AtMg00665)	a) oxidative phosphorylation
ATMG00070	NADH dehydrogenase subunit 9	a) oxidative phosphorylation
ATMG00160	COX2 Cytochrome c oxidase subunit 2	a) oxidative phosphorylation
ATMG00270	ND6	a) oxidative phosphorylation
ATMG00285	ND2 (AtMg00285/AtMg01320)	a) oxidative phosphorylation
ATMG00480	subunit 8 (At2g07707/AtMg00480)	a) oxidative phosphorylation
ATMG00510	NAD7 ND7 NADH dehydrogenase subunit 7	a) oxidative phosphorylation
ATMG00516	ND1	a) oxidative phosphorylation
ATMG00580	ND4	a) oxidative phosphorylation
ATMG00640	subunit b	a) oxidative phosphorylation
ATMG00990	ND3	a) oxidative phosphorylation
ATMG01190	alpha-1 subunit	a) oxidative phosphorylation
AT3G27620	AOX1C Alternative oxidase 1C	a) oxidative phosphorylation
AT4G21490	NDB3 Alternative NAD(P)H dehydrogenase	a) oxidative phosphorylation
AT5G14105	NADH dehydrogenase plant specific subunit 8.5kDa	a) oxidative phosphorylation
AT5G61310	COX5c Cytochrome c oxidase subunit 5c	a) oxidative phosphorylation
AT1G24180	E1 alpha-2 (pyruvate dehydrogenase)	b) pyruvate metabolism & TCA cycle
AT1G53240	malate dehydrogenase 1	b) pyruvate metabolism & TCA cycle
AT1G54220	E3-2 (dihydrolipoamide dehydrogenase)	b) pyruvate metabolism & TCA cycle
AT1G59900	E1 alpha-1 (pyruvate dehydrogenase)	b) pyruvate metabolism & TCA cycle
AT2G05710	aconitate hydratase-2	b) pyruvate metabolism & TCA cycle
AT2G13560	NAD-dependent malic enzyme 1	b) pyruvate metabolism & TCA cycle
AT2G17130	IDH-2 isocitrate dehydrogenase subunit 2	b) pyruvate metabolism & TCA cycle
AT2G20420	succinyl-CoA ligase beta	b) pyruvate metabolism & TCA cycle
AT2G44350	ATCS4 Citrate synthase 4	b) pyruvate metabolism & TCA cycle
AT2G47510	FUM1 (fumarase 1)	b) pyruvate metabolism & TCA cycle
AT3G06483	PDK Pyruvate dehydrogenase kinase	b) pyruvate metabolism & TCA cycle
AT3G09810	isocitrate dehydrogenase-4	b) pyruvate metabolism & TCA cycle
AT3G13930	E3-1 (dihydrolipoamide dehydrogenase)	b) pyruvate metabolism & TCA cycle
AT3G15020	malate dehydrogenase 2	b) pyruvate metabolism & TCA cycle
At3g25860	PDC E2-4 dihydrolipoamide S-acetyltransferase	b) pyruvate metabolism & TCA cycle
AT3G47520	malate dehydrogenase 3	b) pyruvate metabolism & TCA cycle
AT3G52200	E3-1 like (dihydrolipoamide dehydrogenase)	b) pyruvate metabolism & TCA cycle
AT3G55410	E1-2 (oxoglutarate dehydrogenase)	b) pyruvate metabolism & TCA cycle
AT3G60100	CSY5 (citrate synthase 5)	b) pyruvate metabolism & TCA cycle
AT4G00570	NAD-dependent malic enzyme 2	b) pyruvate metabolism & TCA cycle
AT4G26910	KDC E2-4a 2-oxoacid dehydrogenase family protein	b) pyruvate metabolism & TCA cycle
AT4G26970	aconitate hydratase-1	b) pyruvate metabolism & TCA cycle
AT4G35260	isocitrate dehydrogenase-1	b) pyruvate metabolism & TCA cycle
AT4G35650	IDH-3 Isocitrate dehydrogenase subunit 3	b) pyruvate metabolism & TCA cycle
AT4G35830	ACON-3 Aconitate hydratase	b) pyruvate metabolism & TCA cycle
AT5G03290	isocitrate dehydrogenase-5	b) pyruvate metabolism & TCA cycle
AT5G08300	succinyl-CoA ligase (GDP-forming) alpha	b) pyruvate metabolism & TCA cycle
AT5G14590	isocitrate dehydrogenase-2	b) pyruvate metabolism & TCA cycle
AT5G23250	succinyl-CoA ligase (GDP-forming) alpha	b) pyruvate metabolism & TCA cycle
AT5G50850	E1 beta (pyruvate dehydrogenase)	b) pyruvate metabolism & TCA cycle
AT5G50950	FUM Fumarase	b) pyruvate metabolism & TCA cycle
AT5G55070	KDC E2-5 2-oxoacid dehydrogenase family protein	b) pyruvate metabolism & TCA cycle
AT5G65750	OGDC E1 2-Oxoglutarate dehydrogenase component	b) pyruvate metabolism & TCA cycle
AT1G04070	TOM22-I	c) transport
AT1G14140	mt substrate carrier family protein	c) transport
AT1G27390	TOM20-2	c) transport
At1g49410	TOM6	c) transport
AT1G61570	TIM13 Translocase of the inner membrane 13kDa	c) transport
AT1G65290	mtACP2 Mitochondrial acyl-carrier protein 2	c) transport
AT1G72750	TIM23-2	c) transport
AT1G72820	mt substrate carrier family protein	c) transport
AT2G19080	metaxin-related	c) transport
AT2G29530	TIM10	c) transport
AT2G36070	TIM44-2	c) transport
AT2G37410	TIM17-2	c) transport
AT2G46470	OXA1L (OXA1-like)	c) transport
AT3G01280	VDAC1 (voltage dependent anion channel 1)	c) transport
AT3G08580	AAC1 (ADP/ATP carrier 1)	c) transport
At3g11070	SAM50-1	c) transport
AT3G20000	TOM40	c) transport
AT3G27080	TOM20-3	c) transport
AT3G46560	TIM9	c) transport
AT3G48850	Phosphate transporter	c) transport
AT3G54110	PUMP1 (plant uncoupling mt protein 1)	c) transport
AT3G56430	TIM21 like	c) transport
AT4G00026	TIM21 like	c) transport
AT4G00290	mechanosensitive ion channel domain-containing protein	c) transport
AT4G01100	ANT1 (adenine nucleotide transporter 1)	c) transport
AT4G28390	AAC3 (ADP/ATP carrier 3)	c) transport
AT4G39460	SAMC1 (S-adenosylmethionine carrier 1)	c) transport
At5g05520	SAM50-2	c) transport
At5g08040	TOM5	c) transport
At5g09420	OM64	c) transport
AT5G11690	TIM17-3	c) transport
AT5G13490	AAC2 (ADP/ATP carrier 2)	c) transport
AT5G14040	mt phosphate transporter	c) transport
AT5G15090	VDAC3 (voltage dependent anion channel 3)	c) transport
AT5G19760	DTC (dicarboxylate/tricarboxylate carrier)	c) transport
AT5G40930	TOM20-4	c) transport
AT5G41685	TOM7-1	c) transport
AT5G43970	TOM22-V	c) transport
AT5G46800	mt carnitine acyl carrier-like	c) transport
AT5G57490	VDAC4 (voltage dependent anion channel 4)	c) transport
At5g60730	Anion transport	c) transport
AT5G62050	OXA1 (protein transmembrane transporter)	c) transport
AT5G67500	VDAC2 (voltage dependent anion channel 2)	c) transport
AT5G50810	TIM8	c) transport
AT1G55900	TIM50 Translocase Inner Membrane 50	c) transport
AT2G22500	uncoupling protein 5	c) transport
AT5G15640	Putative mitochondrial substrate carrier family protein (MCSF)	c) transport
AT5G24650	Mitochondrial import inner membrane translocase subunit Tim17/Tim22/Tim23 family protein;	c) transport
AT5G58270	ABC transporter of the mitochondrion 3	c) transport
ATMG00900	ABCI3 ABC protein	c) transport
AT1G03860	prohibitin-2	d) protein folding & processing
AT1G14980	HSP10-1	d) protein folding & processing
AT1G23100	HSP10-2	d) protein folding & processing
AT2G20530	prohibitin-6	d) protein folding & processing
AT2G25140	CLPB4 (casein lytic proteinase B4)	d) protein folding & processing
AT2G33210	HSP60-2	d) protein folding & processing
AT3G07770	HSP90.6	d) protein folding & processing
AT3G08950	SCO1 homolog	d) protein folding & processing
AT3G13470	TCP-1 (HSP60 family)	d) protein folding & processing
AT3G13860	HSP60-3A	d) protein folding & processing
AT3G23990	HSP60-3B	d) protein folding & processing
AT3G27280	prohibitin-4	d) protein folding & processing
AT4G26780	Co-chaperone grpE	d) protein folding & processing
AT4G28510	prohibitin-1	d) protein folding & processing
At4g36420	RPL12I ribosomal protein L12 family protein 50S	d) protein folding & processing
AT4G37910	HSP70-1	d) protein folding & processing
AT5G09590	HSP70-2	d) protein folding & processing
AT5G20720	HSP20	d) protein folding & processing
AT5G23140	clp protease P7	d) protein folding & processing
AT5G26860	LON1 (LON protease 1)	d) protein folding & processing
AT5G40770	prohibitin-3	d) protein folding & processing
AT5G44140	ATPHB7 Prohibitin 7	d) protein folding & processing
AT5G48030	GFA2 (gametophytic factor 2)	d) protein folding & processing
At5g49910	heat shock protein 70 / HSP70 (HSC70-7),	d) protein folding & processing
AT5G51220	ubiquinol-cytochrome C chaperone family protein	d) protein folding & processing
AT5G51740	peptidase M48 family protein	d) protein folding & processing
AT5G55200	Co-chaperone grpE	d) protein folding & processing
AT5G56500	TCP-1 (HSP60 family)	d) protein folding & processing
AT2G26140	FTSH4 ATP-dependent peptidase	d) protein folding & processing
AT2G29080	FTSH3 ATP-dependent peptidase	d) protein folding & processing
AT2G35720	OWL1, HSP binding	d) protein folding & processing
AT1G07210	30S ribosomal protein S18 family	e) processing of nucleic acids
AT1G07830	ribosomal protein L29 family protein	e) processing of nucleic acids
AT1G14620	DECOY (ribosomal protein L46)	e) processing of nucleic acids
AT1G16740	ribosomal protein L20 family protein	e) processing of nucleic acids
AT1G16870	mt 28S ribosomal protein S29-related	e) processing of nucleic acids
AT1G24240	ribosomal protein L19 family protein	e) processing of nucleic acids
AT1G26460	PPR1	e) processing of nucleic acids
AT1G33120	60S ribosomal protein L9 (RPL90B)	e) processing of nucleic acids
AT1G45332	Mitochondrial elongation factor	e) processing of nucleic acids
AT1G52370	ribosomal protein L22 family protein	e) processing of nucleic acids
AT1G55890	PPR8-1	e) processing of nucleic acids
AT1G60770	PPR9-1	e) processing of nucleic acids
AT1G61870	PPR6	e) processing of nucleic acids
AT1G74230	GR-RBP5 (glycine-rich RNA-binding protein 5)	e) processing of nucleic acids
AT2G07696	ribosomal protein S7 family protein	e) processing of nucleic acids
AT2G07734	ribosomal protein S4 (RPS4)	e) processing of nucleic acids
AT2G18520	PPR5-2	e) processing of nucleic acids
AT2G20060	ribosomal protein L4 family protein	e) processing of nucleic acids
AT2G42710	ribosomal protein L1 family protein	e) processing of nucleic acids
AT2G44065	ribosomal protein L2 family protein	e) processing of nucleic acids
AT3G01740	ribosomal protein L37	e) processing of nucleic acids
AT3G01790	ribosomal protein L13 family protein	e) processing of nucleic acids
AT3G01800	ribosome recycling factor family protein	e) processing of nucleic acids
AT3G09200	ribosomal protein L10 family	e) processing of nucleic acids
AT3G13160	PPR8-2	e) processing of nucleic acids
AT3G15590	DNA-binding protein	e) processing of nucleic acids
AT3G17465	RPL3P (ribosomal protein L3 plastid)	e) processing of nucleic acids
AT3G18580	single-strand-binding family protein	e) processing of nucleic acids
AT3G20390	endoribonuclease L-PSP family protein	e) processing of nucleic acids
AT3G22310	PMH1 Putative Mitochondrial RNA helicase 1	e) processing of nucleic acids
AT3G22330	PMH2 (putative mt RNA helicase 2)	e) processing of nucleic acids
AT3G46100	ATHRS1 (histidyl-tRNA synthetase 1)	e) processing of nucleic acids
AT3G49010	40S ribosomal protein	e) processing of nucleic acids
AT3G49240	PPR/TPR like helical	e) processing of nucleic acids
AT4G02930	elongation factor Tu	e) processing of nucleic acids
AT4G11010	NDPK3 (nucleoside diphosphate kinase 3)	e) processing of nucleic acids
AT4G11060	mt single-stranded DNA binding protein	e) processing of nucleic acids
AT4G11120	ribosome complex elongation factor Ts	e) processing of nucleic acids
AT4G13850	GRP2 Glycine-rich RNA-binding protein 2	e) processing of nucleic acids
AT4G17300	NS1 (asparagine-tRNA ligase)	e) processing of nucleic acids
AT4G23620	50S ribosomal protein-related	e) processing of nucleic acids
At4g26310	elongation factor P (EF-P) family protein	e) processing of nucleic acids
AT4G28360	ribosomal protein L22 family protein	e) processing of nucleic acids
AT4G30930	ribosomal RPL21M protein	e) processing of nucleic acids
AT4G31460	ribosomal protein L28 family protein	e) processing of nucleic acids
AT4G35850	PPR3	e) processing of nucleic acids
AT4G36680	PPR5-1	e) processing of nucleic acids
At4g38150	PPR_4_16866199 pentatricopeptide (PPR)	e) processing of nucleic acids
AT4G39880	ribosomal protein L23 family protein	e) processing of nucleic acids
AT5G02740	ribosomal protein S24e family protein	e) processing of nucleic acids
AT5G09770	ribosomal protein L17 family protein	e) processing of nucleic acids
AT5G15980	PPR7	e) processing of nucleic acids
AT5G23300	dihydroorotate dehydrogenase	e) processing of nucleic acids
AT5G37590	TPR-like	e) processing of nucleic acids
AT5G47320	RPS19 (ribosomal protein S19)	e) processing of nucleic acids
AT5G52520	tRNA ligase activity	e) processing of nucleic acids
AT5G53070	ribosomal protein L9 family protein	e) processing of nucleic acids
At5g54580	RNA recognition motif (RRM)-containing protein	e) processing of nucleic acids
AT5G61030	GR-RBP3 (glycine-rich RNA-binding protein 3)	e) processing of nucleic acids
AT5G64670	ribosomal protein L15 family protein	e) processing of nucleic acids
AT5G66860	similar to 50S ribosomal protein-related	e) processing of nucleic acids
ATMG00090	ribosomal protein S3	e) processing of nucleic acids
AT1G64880	Ribosomal protein S5 family protein	e) processing of nucleic acids
AT1G70190	Ribosomal protein L7/L12	e) processing of nucleic acids
AT1G80270	PENTATRICOPEPTIDE REPEAT 596	e) processing of nucleic acids
AT5G12100	pentatricopeptide (PPR) repeat-containing protein	e) processing of nucleic acids
AT1G02410	COX assembly protein CtaG / Cox11 family	f) other metabolic pathways
AT1G03090	MCCase Methylcrotonoyl-CoA carboxylase a-subunit	f) other metabolic pathways
At1g06130	hydroxyacylglutathione hydrolase	f) other metabolic pathways
At1g06530	Myosin related	f) other metabolic pathways
AT1G11860	GDT1 aminomethyltransferase	f) other metabolic pathways
AT1G15390	PDF1A Peptide deformylase 1A	f) other metabolic pathways
AT1G17290	AlaAT1 (alanine aminotransferase 1)	f) other metabolic pathways
AT1G17350	auxin-induced-related	f) other metabolic pathways
At1g22800	expressed protein, similar to Biotin synthesis protein bioC	f) other metabolic pathways
AT1G32470	GDH Glycine decarboxylase H subunit	f) other metabolic pathways
AT1G48030	mtLPD-1 (mt lipoamide dehydrogenase-1)	f) other metabolic pathways
AT1G50940	ETFa Electron transfer flavoprotein a-subunit	f) other metabolic pathways
AT1G51610	MTPc4 (metal tolerance protein)	f) other metabolic pathways
AT1G53000	Cytidylyltransferase family	f) other metabolic pathways
AT1G55510	BCDH BETA1 (branched-chain alpha-keto acid decarboxylase E1 beta)	f) other metabolic pathways
AT1G63940	MDAR6 (monodehydroascorbate reductase 6)	f) other metabolic pathways
At1g66540	cytochrome P450	f) other metabolic pathways
AT1G72330	AlaAT2 (alanine aminotransferase 2)	f) other metabolic pathways
AT1G79230	ATMST1 Mecaptopyruvate sulfurtransferase 1	f) other metabolic pathways
AT1G79440	ALDH5F1 (aldehyde dehydrogenase 5F1)	f) other metabolic pathways
AT1G79750	NADP-malic enzyme 4	f) other metabolic pathways
AT2G01140	fructose-bisphosphate aldolase	f) other metabolic pathways
AT2G03780	translin family protein	f) other metabolic pathways
AT2G04940	scramblase-related	f) other metabolic pathways
AT2G14170	ALDH6B2 (3-chloroallyl aldehyde dehydrogenase)	f) other metabolic pathways
AT2G19490	recA family protein	f) other metabolic pathways
At2g19860	HXK2	f) other metabolic pathways
AT2G26080	AtGLDP2 (Arabidopsis thaliana glycine decarboxylase P-protein 2)	f) other metabolic pathways
AT2G30920	ATCOQ3 (coenzyme Q 3)	f) other metabolic pathways
AT2G30970	ASP1 (Aspartate aminotransferase 1)	f) other metabolic pathways
AT2G31240	TPR (tetratricopeptide repeat-containing protein)	f) other metabolic pathways
AT2G34630	GPPS (geranyl diphosphate synthase)	f) other metabolic pathways
AT2G35010	ATO1 Thioredoxin O1	f) other metabolic pathways
AT2G35120	GDH Glycine decarboxylase H subunit	f) other metabolic pathways
AT2G35370	GDH Glycine decarboxylase H subunit	f) other metabolic pathways
AT2G37020	translin family protein	f) other metabolic pathways
At2g38280	FAC1	f) other metabolic pathways
AT2G38400	AGT3 (alanine-glyoxylate aminotransferase 3)	f) other metabolic pathways
AT2G38660	tetrahydrofolate dehydrogenase/cyclohydrolase	f) other metabolic pathways
AT2G38670	PECT1 (phosphorylethanolamine cytidylyltransferase 1)	f) other metabolic pathways
AT2G39795	mt glycoprotein family protein	f) other metabolic pathways
AT2G41600	mt glycoprotein family protein	f) other metabolic pathways
At2g43400	Electron-transfer flavoprotein:ubiquinone oxidoreductase (ETFQO)	f) other metabolic pathways
AT3G03590	SWIB complex BAF60b domain-containing protein	f) other metabolic pathways
AT3G03910	GDH3 (glutamate dehydrogenase 3)	f) other metabolic pathways
AT3G06050	PRXIIF (peroxiredoxin IIF)	f) other metabolic pathways
At3g06850	BCKDC E2a branched chain alpha-keto acid dehydrogenase E2 subunit (din3),	f) other metabolic pathways
AT3G07060	embryo defective 1974	f) other metabolic pathways
AT3G10370	SDP6 (sugar-dependent 6)	f) other metabolic pathways
AT3G10920	Mn-SOD	f) other metabolic pathways
AT3G13110	SAT-3 Serine Acetyltransferase	f) other metabolic pathways
AT3G15000	similar to plastid developmental protein DAG	f) other metabolic pathways
AT3G15660	GRX4 (glutaredoxin 4)	f) other metabolic pathways
AT3G17240	mtLPD-2 (mt lipoamide dehydrogenase-2)	f) other metabolic pathways
AT3G17910	SURF1 (SURFEIT 1)	f) other metabolic pathways
At3g20040	HXK4	f) other metabolic pathways
AT3G20970	NFU4( NFU domain protein 4)	f) other metabolic pathways
AT3G22200	4-Aminobutyrate aminotransferase	f) other metabolic pathways
AT3G24200	FAD/NAD(P)-binding oxidoreductase family protein	f) other metabolic pathways
AT3G26770	short-chain dehydrogenase/reductase (SDR) family protein	f) other metabolic pathways
AT3G27890	NQR (NADPH:quinone oxidoreductase)	f) other metabolic pathways
AT3G45300	IVD (isovaleryl-CoA dehydrogenase)	f) other metabolic pathways
AT3G45770	polyketide synthase, enoylreductase family	f) other metabolic pathways
AT3G48000	ALDH2 (aldehyde dehydrogenase 2)	f) other metabolic pathways
AT3G50930	BCS1 (cytochrome bc1 synthesis)	f) other metabolic pathways
At3g52570	expressed protein, contains Interpro entry IPR000379	f) other metabolic pathways
AT3G52960	PrxII E Peroxiredoxin IIE	f) other metabolic pathways
AT3G55400	OVA1 (ovule abortion 1)	f) other metabolic pathways
AT3G56070	ROC2 (rotamase cyclophilin 2)	f) other metabolic pathways
AT3G58610	ketol-acid reductoisomerase	f) other metabolic pathways
AT3G58840	tropomyosin-related	f) other metabolic pathways
AT3G59760	OASC (O-acetylserine (thiol) lyase isoform C)	f) other metabolic pathways
At3g61440	ARATH;BSAS3;1 CYSC1 encodes a cysteine synthase isomer	f) other metabolic pathways
At3g63150	MIRO2	f) other metabolic pathways
AT4G03140	NAD(P)-binding Rossmann-fold superfamily protein	f) other metabolic pathways
AT4G04180	AAA-type ATPase family	f) other metabolic pathways
At4g08390	APX-4 L-ascorbate peroxidase, stromal (sAPX),	f) other metabolic pathways
AT4G08870	arginase	f) other metabolic pathways
AT4G08900	arginase	f) other metabolic pathways
At4g09320	nucleoside diphosphate kinase 1 (NDK1),	f) other metabolic pathways
At4g12130	Glycine cleavage T-protein family	f) other metabolic pathways
AT4G15940	fumarylacetoacetate hydrolase family protein	f) other metabolic pathways
AT4G19540	INDL (iron-sulfur protein required for NADH dehydrogenase)-like	f) other metabolic pathways
AT4G19880	glutathione S-transferase family protein	f) other metabolic pathways
At4g20930	HIBDH-5 3-hydroxyisobutyrate dehydrogenase	f) other metabolic pathways
AT4G23900	NDPK4 Nucleoside diphosphate kinase 4	f) other metabolic pathways
AT4G25100	Fe-SOD	f) other metabolic pathways
AT4G29120	6-phosphogluconate dehydrogenase	f) other metabolic pathways
At4g29130	HXK1	f) other metabolic pathways
At4g31810	E-CoAH-4 enoyl-CoA hydratase	f) other metabolic pathways
AT4G32360	pyridine nucleotide-disulphide oxidoreductase family	f) other metabolic pathways
AT4G33010	AtGLDP1 (Arabidopsis thaliana glycine decarboxylase P-protein 1)	f) other metabolic pathways
AT4G34030	MCCB (3-methylcrotonyl-CoA carboxylase)	f) other metabolic pathways
AT4G35460	NADPH-dependent thioredoxin reductase	f) other metabolic pathways
At4g36400	D-2-hydroxyglutarate dehydrogenase	f) other metabolic pathways
AT4G37930	SHM1 (serine transhydroxymethyltransferase 1)	f) other metabolic pathways
AT4G39660	AGT2 (alanine-glyoxylate aminotransferase 2)	f) other metabolic pathways
AT5G05990	mt glycoprotein family protein	f) other metabolic pathways
AT5G06580	FAD linked oxidase family protein	f) other metabolic pathways
AT5G07440	GDH2 (glutamate dehydrogenase 2)	f) other metabolic pathways
AT5G10860	Cystathionine beta-synthase (CBS) family protein	f) other metabolic pathways
AT5G11520	ASP3 (aspartate aminotransferase 3)	f) other metabolic pathways
At5g12290	DGS1	f) other metabolic pathways
AT5G13420	transaldolase	f) other metabolic pathways
At5g17770	NADH:cytochrome B5 reductase	f) other metabolic pathways
AT5G18170	GDH1 (glutamate dehydrogenase 1)	f) other metabolic pathways
AT5G20080	NADH-cytochrome b5 reductase	f) other metabolic pathways
At5g22350	ELM1	f) other metabolic pathways
AT5G25940	early nodulin-related	f) other metabolic pathways
AT5G26780	SHM2 (serine hydroxymethyltransferase 2)	f) other metabolic pathways
AT5G27540	MIRO1 (Miro-related GTP-ase 1)	f) other metabolic pathways
AT5G27760	hypoxia-responsive family protein	f) other metabolic pathways
At5g35360	MCCase alpha-2 acetyl-CoA carboxylase	f) other metabolic pathways
AT5G39410	saccharopine dehydrogenase	f) other metabolic pathways
AT5G41480	dihydrofolate synthetase	f) other metabolic pathways
AT5G41670	6-phosphogluconate dehydrogenase family protein	f) other metabolic pathways
AT5G42150	Glutathione S-transferase family protein	f) other metabolic pathways
AT5G43430	ETF beta (electron carrier)	f) other metabolic pathways
AT5G46180	ornithine-delta-aminotransferase	f) other metabolic pathways
AT5G49555	FAD/NAD(P)-binding oxidoreductase family	f) other metabolic pathways
AT5G50370	adenylate kinase family	f) other metabolic pathways
AT5G53350	CLPX (nucleoside-triphosphatase)	f) other metabolic pathways
AT5G57300	UBiE UbiE/COQ5 Methyltransferase	f) other metabolic pathways
AT5G58070	TIL (temperature-induced lipocalin)	f) other metabolic pathways
AT5G62530	P5CDH (1-pyrroline-5-carboxylate dehydrogenase)	f) other metabolic pathways
AT5G63400	ADK1 Adenylate kinase 1	f) other metabolic pathways
AT5G63620	zinc-binding dehydrogenase	f) other metabolic pathways
AT5G65720	NIFS1 Nitrogen fixation S homolog 1	f) other metabolic pathways
At5g66120	3-dehydroquinate synthase	f) other metabolic pathways
AT3G61530	Phosphoenolpyruvate carboxylase family protein;	f) other metabolic pathways
AT1G48420	D-cysteine desulfhydrase	f) other metabolic pathways
AT2G43360	Radical SAM superfamily protein, BIOTIN AUXOTROPH 2 (BIO2)	f) other metabolic pathways
AT5G54770	thiazole biosynthetic enzyme	f) other metabolic pathways
AT1G15220	cytochrome c biogenesis protein family	f) other metabolic pathways
AT4G39740	HCC2 Mitochondrial copper chaperone involved in CV assembly	f) other metabolic pathways
AT5G14780	FDH Formate dehydrogenase	f) other metabolic pathways
At1g05270	TraB family protein	g) uncharacterized
AT1G08220	Unknown protein	g) uncharacterized
At1g09300	Metallopeptidase M24 family protein	g) uncharacterized
AT1G19140	Unknown protein	g) uncharacterized
At1g24267	Unknown protein	g) uncharacterized
AT1G26750	Unknown protein	g) uncharacterized
At1g32580	DAG3 plastid developmental protein DAG	g) uncharacterized
AT1G48200	Unknown protein	g) uncharacterized
AT1G53760	Unknown protein	g) uncharacterized
AT1G55160	Unknown protein	g) uncharacterized
AT1G65032	Unknown protein	g) uncharacterized
AT1G71310	Unknown protein	g) uncharacterized
At2g01460	ATP binding/kinase	g) uncharacterized
AT2G04340	Unknown protein	g) uncharacterized
AT2G20940	Unknown protein	g) uncharacterized
At2g35240	DAG6 plastid developmental protein DAG	g) uncharacterized
AT2G35605	Unknown Protein, SWIB complex BAF60b domain-containing	g) uncharacterized
AT2G40800	Unknown protein	g) uncharacterized
At2g41380	embryo-abundant protein-related	g) uncharacterized
AT2G45060	Unknown protein	g) uncharacterized
AT2G45930	Unknown protein	g) uncharacterized
AT2G46540	Unknown protein	g) uncharacterized
At3g07480	expressed protein adrenodoxin	g) uncharacterized
AT3G07568	Unknown protein	g) uncharacterized
AT3G16700	Fumarylacetoacetate hydrolase	g) uncharacterized
AT3G18240	unknown protein	g) uncharacterized
At3g27930	Unknown protein	g) uncharacterized
At3g28700	expressed protein, contains Pfam PF02636	g) uncharacterized
At3g45740	hydrolase family protein	g) uncharacterized
At3g50940	BCS-1-like	g) uncharacterized
At3g55605	mitochondrial glycoprotein family protein / MAM33 family protein	g) uncharacterized
AT3G62530	ARM repeat superfamily protein	g) uncharacterized
AT4G05400	Unknown protein	g) uncharacterized
AT4G05590.2	Unknown protein	g) uncharacterized
AT4G14695	Unknown protein	g) uncharacterized
AT4G21460	unknown protein	g) uncharacterized
AT4G22310	Unknown protein	g) uncharacterized
AT4G23885	Unknown protein	g) uncharacterized
AT4G26410	Unknown protein	g) uncharacterized
AT4G27585	Stomatin-like protein	g) uncharacterized
At4g32605	no apical meristem (NAM) family protein (transcription factor)	g) uncharacterized
At4g32610	mitochondrial glycoprotein family protein / MAM33 family protein	g) uncharacterized
AT4G39690	At4g39690, mitofilin related	g) uncharacterized
At5g02050	mitochondrial glycoprotein family protein / MAM33 family protein	g) uncharacterized
AT5G08060	Unknown protein	g) uncharacterized
AT5G10730	Unknown protein	g) uncharacterized
AT5G20090	Unknown protein	g) uncharacterized
AT5G24165	Unknown protein	g) uncharacterized
At5g41970	similar to expressed protein	g) uncharacterized
AT5G49210	Unknown protein	g) uncharacterized
AT5G51040	Unknown protein	g) uncharacterized
AT5G53650	Unknown protein	g) uncharacterized
At5g54100	band 7 family protein, similar to stomatin-like protein	g) uncharacterized
At5g55610	Unknown protein	g) uncharacterized
AT5G67490	Unknown protein	g) uncharacterized
AT2G21640	Unknown protein	g) uncharacterized
AT5G15910	NAD(P)-binding Rossmann-fold superfamily protein;	g) uncharacterized
AT4G05590	unknown protein	g) uncharacterized
AT3G26760	NAD(P)-binding Rossmann-fold superfamily protein;	g) uncharacterized
AT5G39900	Small GTP-binding protein;	g) uncharacterized
At1g51390	NFU5 Fe−S centre protein	g) uncharacterized
AT3G06790	plastid developmental protein DAG	g) uncharacterized
AT1G20430	unknown protein	g) uncharacterized
AT1G22520	Unknown protein	g) uncharacterized
AT2G43780	Unknown protein	g) uncharacterized
AT3G59820	LETM1-like protein;	g) uncharacterized
AT5G15320	Unknown protein	g) uncharacterized
AT5G15910	NAD-dependent epimerase/dehydratase	g) uncharacterized
AT5G27395	Unknown protein	g) uncharacterized

## Sheet: Table S1C
Accession	Name	Physiological function
AT1G07180	alternative NAD(P)H dehydrogenase 1	a) oxidative phosphorylation				GFP	Proteomics		GFP+proteomics
AT1G58180	beta carbonic anhydrase 6;	a) oxidative phosphorylation			FunCat	#	#	%	#	%
AT4G28220	NAD(P)H dehydrogenase B1;	a) oxidative phosphorylation			Oxidative phosphorylation	7	119	23.6111	126	17.3554
AT5G08740	NAD(P)H dehydrogenase C1;	a) oxidative phosphorylation			Pyruvate metabolism and TCA cycle	0	33	6.54762	33	4.54545
AT5G23395	Cox19-like CHCH family protein;	a) oxidative phosphorylation			Transport	17	50	9.92063	67	9.22865
AT5G40660	ATP12 protein-related;	a) oxidative phosphorylation			Protein folding and processing	21	31	6.15079	52	7.16253
AT5G64210	alternative oxidase 2;	a) oxidative phosphorylation			Processing of nucleic acids	78	66	13.0952	144	19.8347
AT1G17530	translocase of inner mitochondrial membrane 23	c) transport			Other metabolic pathways	30	136	26.9841	166	22.865
AT1G20350	translocase inner membrane subunit 17-1;	c) transport			Uncharacterized	69	69	13.6905	138	19.0083
AT1G25380	NAD+ transporter 2	c) transport				222	504		726
AT2G25680	molybdate transporter 1	c) transport
AT2G37410.2	translocase inner membrane subunit 17-2;	c) transport
AT2G42210.4	Mitochondrial import inner membrane translocase subunit Tim17/Tim22/Tim23 family protein;	c) transport
AT3G04800	translocase inner membrane subunit 23-3;	c) transport
AT3G17970	translocon at the outer membrane of chloroplasts 64-III	c) transport
AT3G21390	Mitochondrial substrate carrier family protein;	c) transport
AT3G25120	Mitochondrial import inner membrane translocase subunit Tim17/Tim22/Tim23 family protein;	c) transport
AT3G55640	Mitochondrial substrate carrier family protein;	c) transport
AT4G24570	dicarboxylate carrier 2;	c) transport
AT4G28620	ABC transporter of the mitochondrion 2	c) transport
AT4G28630	ABC transporter of the mitochondrion 1;	c) transport
AT4G32400	Mitochondrial substrate carrier family protein	c) transport
AT5G48970	Mitochondrial substrate carrier family protein;	c) transport
AT5G61810.2	Mitochondrial substrate carrier family protein;	c) transport
AT1G14270	CAAX amino terminal protease family protein;	d) protein folding & processing
AT1G33360	ATP-dependent Clp protease;Encodes ClpX3, a subunit of the Clp protease complex.	d) protein folding & processing
AT1G49630	presequence protease 2	d) protein folding & processing
AT1G51150	DegP protease 6;Encodes a putative DegP protease.	d) protein folding & processing
AT1G52560	HSP20-like chaperones superfamily protein	d) protein folding & processing
AT1G65630	DegP protease 3;Encodes a putative DegP protease.	d) protein folding & processing
AT3G03380	DegP protease 7;Encodes a putative DegP protease.	d) protein folding & processing
AT3G05790	lon protease 4	d) protein folding & processing
AT3G16540	DegP protease 11;Encodes a putative DegP protease.	d) protein folding & processing
AT3G16540.1	DegP protease 11Encodes a putative DegP protease.	d) protein folding & processing
AT3G16550	DEGP protease 12;Encodes a putative DegP protease.	d) protein folding & processing
AT3G19170	presequence protease 1	d) protein folding & processing
AT3G25740	methionine aminopeptidase 1C	d) protein folding & processing
AT4G25200	mitochondrion-localized small heat shock protein 23.6	d) protein folding & processing
AT4G36580	AAA-type ATPase family protein;	d) protein folding & processing
AT4G37040	methionine aminopeptidase 1D;	d) protein folding & processing
AT5G14660	peptide deformylase 1B;	d) protein folding & processing
AT5G16200	50S ribosomal protein-related;	d) protein folding & processing
AT5G36950	DegP protease 10;Encodes a putative DegP protease.	d) protein folding & processing
AT5G49840	ATP-dependent Clp protease	d) protein folding & processing
AT5G51440	HSP20-like chaperones superfamily protein	d) protein folding & processing
AT1G08130	DNA ligase 1	e) processing of nucleic acids
AT1G09680	Pentatricopeptide repeat (PPR) superfamily protein;	e) processing of nucleic acids
AT1G11870	Seryl-tRNA synthetase	e) processing of nucleic acids
AT1G14610	valyl-tRNA synthetase / valine--tRNA ligase (VALRS)	e) processing of nucleic acids
AT1G17560	Ribosomal protein L14p/L23e family protein;	e) processing of nucleic acids
AT1G19290	Pentatricopeptide repeat (PPR) superfamily protein	e) processing of nucleic acids
AT1G20300	Pentatricopeptide repeat (PPR) superfamily protein;	e) processing of nucleic acids
AT1G21150	Mitochondrial transcription termination factor family protein;	e) processing of nucleic acids
AT1G29880	glycyl-tRNA synthetase / glycine--tRNA ligase;	e) processing of nucleic acids
AT1G50200	Alanyl-tRNA synthetase;	e) processing of nucleic acids
AT1G50840	polymerase gamma 2;DNA Polymerase gamma2	e) processing of nucleic acids
AT1G61960	Mitochondrial transcription termination factor family protein;	e) processing of nucleic acids
AT1G61980	Mitochondrial transcription termination factor family protein;	e) processing of nucleic acids
AT1G61990	Mitochondrial transcription termination factor family protein;	e) processing of nucleic acids
AT1G62010	Mitochondrial transcription termination factor family protein;	e) processing of nucleic acids
AT1G62110	Mitochondrial transcription termination factor family protein;	e) processing of nucleic acids
AT1G62120	Mitochondrial transcription termination factor family protein;	e) processing of nucleic acids
AT1G62150	Mitochondrial transcription termination factor family protein;	e) processing of nucleic acids
AT1G74120	Mitochondrial transcription termination factor family protein;	e) processing of nucleic acids
AT1G74600	pentatricopeptide (PPR) repeat-containing protein;	e) processing of nucleic acids
AT1G74900	Pentatricopeptide repeat (PPR) superfamily protein	e) processing of nucleic acids
AT1G77750	Ribosomal protein S13/S18 family;	e) processing of nucleic acids
AT1G79220	Mitochondrial transcription termination factor family protein;	e) processing of nucleic acids
AT1G79490	Pentatricopeptide repeat (PPR) superfamily protein;	e) processing of nucleic acids
AT2G04842	threonyl-tRNA synthetase,	e) processing of nucleic acids
AT2G15630	Pentatricopeptide repeat (PPR) superfamily protein;	e) processing of nucleic acids
AT2G19280	Pentatricopeptide repeat (PPR) superfamily protein;	e) processing of nucleic acids
AT2G31170	Cysteinyl-tRNA synthetase	e) processing of nucleic acids
AT2G34370	Pentatricopeptide repeat (PPR) superfamily protein;	e) processing of nucleic acids
AT2G35030	Pentatricopeptide repeat (PPR) superfamily protein	e) processing of nucleic acids
AT2G44020	Mitochondrial transcription termination factor family protein;	e) processing of nucleic acids
AT3G02010	Pentatricopeptide repeat (PPR) superfamily protein;	e) processing of nucleic acids
AT3G02330	Pentatricopeptide repeat (PPR) superfamily protein	e) processing of nucleic acids
AT3G02660	Tyrosyl-tRNA synthetase, class Ib, bacterial/mitochondrial;	e) processing of nucleic acids
AT3G08820	Pentatricopeptide repeat (PPR) superfamily protein	e) processing of nucleic acids
AT3G11460	Pentatricopeptide repeat (PPR) superfamily protein;	e) processing of nucleic acids
AT3G12370	Ribosomal protein L10 family protein;	e) processing of nucleic acids
AT3G13490	Lysyl-tRNA synthetase, class II;	e) processing of nucleic acids
AT3G13770	Pentatricopeptide repeat (PPR) superfamily protein;	e) processing of nucleic acids
AT3G15140	Polynucleotidyl transferase, ribonuclease H-like superfamily protein;	e) processing of nucleic acids
AT3G16890	pentatricopeptide (PPR) domain protein 40	e) processing of nucleic acids
AT3G20540	polymerase gamma 1;	e) processing of nucleic acids
AT3G23830	glycine-rich RNA-binding protein 4;	e) processing of nucleic acids
AT3G46950	Mitochondrial transcription termination factor family protein;	e) processing of nucleic acids
AT3G48110	glycine-tRNA ligases;glycine-tRNA ligase	e) processing of nucleic acids
AT3G48250	Pentatricopeptide repeat (PPR) superfamily protein	e) processing of nucleic acids
AT3G48810	Pentatricopeptide repeat (PPR) superfamily protein	e) processing of nucleic acids
AT3G58140	phenylalanyl-tRNA synthetase class IIc family protein;	e) processing of nucleic acids
AT3G60400	Mitochondrial transcription termination factor family protein;	e) processing of nucleic acids
AT4G02820	Pentatricopeptide repeat (PPR) superfamily protein;	e) processing of nucleic acids
AT4G14790	ATP-dependent RNA helicase	e) processing of nucleic acids
AT4G20090	Pentatricopeptide repeat (PPR) superfamily protein;	e) processing of nucleic acids
AT4G31210	DNA topoisomerase, type IA, core;	e) processing of nucleic acids
AT4G32450	Pentatricopeptide repeat (PPR) superfamily protein	e) processing of nucleic acids
AT4G33760	tRNA synthetase class II (D, K and N) family protein;	e) processing of nucleic acids
AT4G38160	Mitochondrial transcription termination factor family protein;	e) processing of nucleic acids
AT5G03800	Pentatricopeptide repeat (PPR) superfamily protein	e) processing of nucleic acids
AT5G06540	Pentatricopeptide repeat (PPR) superfamily protein	e) processing of nucleic acids
AT5G06810	Mitochondrial transcription termination factor family protein;	e) processing of nucleic acids
AT5G07900	Mitochondrial transcription termination factor family protein;	e) processing of nucleic acids
AT5G08710	Regulator of chromosome condensation (RCC1) family protein;	e) processing of nucleic acids
AT5G15340	Pentatricopeptide repeat (PPR) superfamily protein;	e) processing of nucleic acids
AT5G15700	DNA/RNA polymerases superfamily protein	e) processing of nucleic acids
AT5G16715	ATP binding;valine-tRNA ligases;	e) processing of nucleic acids
AT5G17660	tRNA (guanine-N-7) methyltransferase;	e) processing of nucleic acids
AT5G22800	Alanyl-tRNA synthetase	e) processing of nucleic acids
AT5G26830	Threonyl-tRNA synthetase;	e) processing of nucleic acids
AT5G39680	Pentatricopeptide repeat (PPR) superfamily protein	e) processing of nucleic acids
AT5G46160	Ribosomal protein L14p/L23e family protein;	e) processing of nucleic acids
AT5G46920	Intron maturase, type II family protein;	e) processing of nucleic acids
AT5G48330	Regulator of chromosome condensation (RCC1) family protein;	e) processing of nucleic acids
AT5G48910	Pentatricopeptide repeat (PPR) superfamily protein	e) processing of nucleic acids
AT5G49030	tRNA synthetase class I (I, L, M and V) family protein;	e) processing of nucleic acids
AT5G56940	Ribosomal protein S16 family protein	e) processing of nucleic acids
AT5G60960	Pentatricopeptide repeat (PPR) superfamily protein;	e) processing of nucleic acids
AT5G61370	Pentatricopeptide repeat (PPR) superfamily protein;	e) processing of nucleic acids
AT5G64050	glutamate tRNA synthetase;	e) processing of nucleic acids
AT5G64950	Mitochondrial transcription termination factor family protein;	e) processing of nucleic acids
AT1G10060	branched-chain amino acid transaminase 1;	f) other metabolic pathways
AT1G13900	Purple acid phosphatases superfamily protein;	f) other metabolic pathways
AT1G14830	DYNAMIN-like 1C;	f) other metabolic pathways
AT1G49530	geranylgeranyl pyrophosphate synthase 6;	f) other metabolic pathways
AT1G74260	purine biosynthesis 4	f) other metabolic pathways
AT2G04540	Beta-ketoacyl synthase;	f) other metabolic pathways
AT2G14120	dynamin related protein;	f) other metabolic pathways
AT2G16530	3-oxo-5-alpha-steroid 4-dehydrogenase family protein;	f) other metabolic pathways
AT2G39290	phosphatidylglycerolphosphate synthase 1	f) other metabolic pathways
AT2G46110	ketopantoate hydroxymethyltransferase 1;	f) other metabolic pathways
AT3G01020	ISCU-like 2;	f) other metabolic pathways
AT3G02780	isopentenyl pyrophosphate:dimethylallyl pyrophosphate isomerase 2	f) other metabolic pathways
AT3G10140	RECA homolog 3;	f) other metabolic pathways
AT3G23630	isopentenyltransferase 7	f) other metabolic pathways
AT3G54660	glutathione reductase;	f) other metabolic pathways
AT3G60190	DYNAMIN-like 1E;	f) other metabolic pathways
AT4G04080	ISCU-like 3;	f) other metabolic pathways
AT4G04320	malonyl-CoA decarboxylase family protein;	f) other metabolic pathways
AT4G05450	mitochondrial ferredoxin 1;	f) other metabolic pathways
AT4G21090	MITOCHONDRIAL FERREDOXIN 2;	f) other metabolic pathways
AT4G22220	SufE/NifU family protein;	f) other metabolic pathways
AT4G23660	polyprenyltransferase 1;	f) other metabolic pathways
AT4G27940	manganese tracking factor for mitochondrial SOD2;	f) other metabolic pathways
AT4G33650	dynamin-related protein 3A;	f) other metabolic pathways
AT5G03455	Rhodanese/Cell cycle control phosphatase superfamily protein	f) other metabolic pathways
AT5G04140	glutamate synthase 1;	f) other metabolic pathways
AT5G38710	Methylenetetrahydrofolate reductase family protein;	f) other metabolic pathways
AT5G50240	protein-l-isoaspartate methyltransferase 2;	f) other metabolic pathways
AT5G54770	thiazole biosynthetic enzyme, chloroplast (ARA6) (THI1) (THI4)	f) other metabolic pathways
AT5G63980	Inositol monophosphatase family protein;	f) other metabolic pathways
AT1G06750	P-loop containing nucleoside triphosphate hydrolases superfamily protein;	g) uncharacterized
AT1G10270	glutamine-rich protein 23;	g) uncharacterized
AT1G18600	RHOMBOID-like protein 12	g) uncharacterized
AT1G21400	Thiamin diphosphate-binding fold (THDP-binding) superfamily protein;	g) uncharacterized
AT1G28395	Unknown protein	g) uncharacterized
AT1G28960	nudix hydrolase homolog 15;	g) uncharacterized
AT1G30680	toprim domain-containing protein;	g) uncharacterized
AT1G31760	SWIB/MDM2 domain superfamily protein;	g) uncharacterized
AT1G34470	Protein of unknown function (DUF803);	g) uncharacterized
AT1G49880	Erv1/Alr family protein;	g) uncharacterized
AT1G52080	actin binding protein family;unknown function	g) uncharacterized
AT1G56570	Tetratricopeptide repeat (TPR)-like superfamily protein;	g) uncharacterized
AT1G59720	Tetratricopeptide repeat (TPR)-like superfamily protein	g) uncharacterized
AT1G64310	Tetratricopeptide repeat (TPR)-like superfamily protein	g) uncharacterized
AT1G65420	Protein of unknown function (DUF565)	g) uncharacterized
AT1G67620	Lojap-related protein;	g) uncharacterized
AT1G68990	male gametophyte defective 3;	g) uncharacterized
AT1G69350	Tetratricopeptide repeat (TPR)-like superfamily protein	g) uncharacterized
AT1G71260	WHIRLY 2	g) uncharacterized
AT1G71850	Ubiquitin carboxyl-terminal hydrolase family protein;	g) uncharacterized
AT1G73940	Unknown protein	g) uncharacterized
AT1G74130	Rhomboid-related intramembrane serine protease family protein	g) uncharacterized
AT1G78620	Protein of unknown function DUF92,	g) uncharacterized
AT1G79430	Homeodomain-like superfamily protein;	g) uncharacterized
AT2G01390	Tetratricopeptide repeat (TPR)-like superfamily protein;	g) uncharacterized
AT2G15680	Calcium-binding EF-hand family protein;	g) uncharacterized
AT2G15690	Tetratricopeptide repeat (TPR)-like superfamily protein	g) uncharacterized
AT2G25840	Nucleotidylyl transferase superfamily protein;	g) uncharacterized
AT2G39120	Ubiquitin carboxyl-terminal hydrolase family protein;	g) uncharacterized
AT2G40240	Tetratricopeptide repeat (TPR)-like superfamily protein;	g) uncharacterized
AT2G47770	TSPO(outer membrane tryptophan-rich sensory protein)-related;	g) uncharacterized
AT3G13880	Tetratricopeptide repeat (TPR)-like superfamily protein;	g) uncharacterized
AT3G15130	Tetratricopeptide repeat (TPR)-like superfamily protein	g) uncharacterized
AT3G19440	Pseudouridine synthase family protein;	g) uncharacterized
AT3G24000	Tetratricopeptide repeat (TPR)-like superfamily protein;	g) uncharacterized
AT3G47450	P-loop containing nucleoside triphosphate hydrolases superfamily protein;	g) uncharacterized
AT3G49740	Tetratricopeptide repeat (TPR)-like superfamily protein	g) uncharacterized
AT3G54510	Early-responsive to dehydration stress protein (ERD4);	g) uncharacterized
AT3G56830	Protein of unknown function (DUF565)	g) uncharacterized
AT3G57090	Tetratricopeptide repeat (TPR)-like superfamily protein;	g) uncharacterized
AT3G58160	P-loop containing nucleoside triphosphate hydrolases superfamily protein	g) uncharacterized
AT4G02750	Tetratricopeptide repeat (TPR)-like superfamily protein;	g) uncharacterized
AT4G04370	Tetratricopeptide repeat (TPR)-like superfamily protein	g) uncharacterized
AT4G15640	Unknown protein	g) uncharacterized
AT4G16695	Unknown protein	g) uncharacterized
AT4G21170	Tetratricopeptide repeat (TPR)-like superfamily protein;	g) uncharacterized
AT4G29540	bacterial transferase hexapeptide repeat-containing protein;	g) uncharacterized
AT4G30490	AFG1-like ATPase family protein;	g) uncharacterized
AT4G33170	Tetratricopeptide repeat (TPR)-like superfamily protein	g) uncharacterized
AT5G03770	KDO transferase A;	g) uncharacterized
AT5G04895	DEA(D/H)-box RNA helicase family protein;	g) uncharacterized
AT5G05570	transducin family protein / WD-40 repeat family protein;	g) uncharacterized
AT5G09950	Tetratricopeptide repeat (TPR)-like superfamily protein;	g) uncharacterized
AT5G13230	Tetratricopeptide repeat (TPR)-like superfamily protein;	g) uncharacterized
AT5G14770	Tetratricopeptide repeat (TPR)-like superfamily protein;	g) uncharacterized
AT5G23040	Protein of unknown function (DUF3353)	g) uncharacterized
AT5G23060	calcium sensing receptor	g) uncharacterized
AT5G24120	sigma factor E;	g) uncharacterized
AT5G24850	cryptochrome 3	g) uncharacterized
AT5G27110	Tetratricopeptide repeat (TPR)-like superfamily protein	g) uncharacterized
AT5G27660	Trypsin family protein with PDZ domain	g) uncharacterized
AT5G39350	Tetratricopeptide repeat (TPR)-like superfamily protein	g) uncharacterized
AT5G39710	Tetratricopeptide repeat (TPR)-like superfamily protein;	g) uncharacterized
AT5G39960	GTP binding;GTP binding;	g) uncharacterized
AT5G43050	Protein of unknown function (DUF565)	g) uncharacterized
AT5G47455	Unknown protein	g) uncharacterized
AT5G51020	crumpled leaf;Encodes CRL (CRUMPLED LEAF)	g) uncharacterized
AT5G52970	thylakoid lumen 15.0 kDa protein;	g) uncharacterized
AT5G55740	Tetratricopeptide repeat (TPR)-like superfamily protein	g) uncharacterized
